# Supplementary material
Source: MDPI journal article supplement (https://www.mdpi.com/2071-1050/14/7/3994)
Supplement: s1 [file s1]

## Supplementary Material – 2 (S2)

### QA/QC Data for PAHs and *dl*-PCBs

Table S2-1. Measurement details for PAH congener analysis in muscle tissue of the FISH samples.

| Polycyclic Aromatics<br>Hydrocarbons (PAHs) | <i>Notothenia coriiceps</i><br>Sample weight:3.25 g<br>Final extract vol.: 1000 µL<br>Injection vol.:2 µL |           |                  |                  | <i>Trematomus bernacchii</i><br>Sample weight:7.02 g<br>Final extract vol.: 1000 µL<br>Injection vol.:2 µL |           |                  |                  |
|---------------------------------------------|-----------------------------------------------------------------------------------------------------------|-----------|------------------|------------------|------------------------------------------------------------------------------------------------------------|-----------|------------------|------------------|
|                                             | Result<br>(ng/g dw)                                                                                       | MU<br>(%) | LOD<br>(ng/g dw) | LOQ<br>(ng/g dw) | Result<br>(ng/g dw)                                                                                        | MU<br>(%) | LOD<br>(ng/g dw) | LOQ<br>(ng/g dw) |
| Acquisition Date:<br>10 Nov 2016            |                                                                                                           |           |                  |                  |                                                                                                            |           |                  |                  |
| Naphthalene                                 | <4.6                                                                                                      | ----      | 0.019            | 4.60             | <4.3                                                                                                       | ----      | 0.014            | 4.30             |
| Acenaphthylene                              | <0.62                                                                                                     | ----      | 0.027            | 0.62             | <0.39                                                                                                      | ----      | 0.023            | 0.39             |
| Acenaphthene                                | <0.62                                                                                                     | ----      | 0.036            | 0.62             | <0.85                                                                                                      | ----      | 0.031            | 0.85             |
| Fluorene                                    | <3.1                                                                                                      | ----      | 0.043            | 3.10             | <3.1                                                                                                       | ----      | 0.036            | 3.10             |
| Phenanthrene                                | 10.0 ±30.0                                                                                                |           | 0.013            | 5.40             | 9.80 ±30.0                                                                                                 |           | 0.011            | 2.50             |
| Anthracene                                  | <0.46                                                                                                     | ----      | 0.017            | 0.46             | <0.46                                                                                                      | ----      | 0.014            | 0.46             |
| Fluoranthene                                | 4.70 ±30.0                                                                                                |           | 0.014            | 2.00             | 3.40 ±30.0                                                                                                 |           | 0.012            | 0.93             |
| Pyrene                                      | 7.80 ±30.0                                                                                                |           | 0.012            | 2.80             | 7.70 ±30.0                                                                                                 |           | 0.011            | 1.30             |
| Benz(a)anthracene                           | <0.46                                                                                                     | ----      | 0.016            | 0.46             | <0.36                                                                                                      | ----      | 0.014            | 0.36             |
| Chrysene                                    | <0.46                                                                                                     | ----      | 0.018            | 0.46             | <0.21                                                                                                      | ----      | 0.015            | 0.21             |
| Benzo(b)fluoranthene                        | <0.31                                                                                                     | ----      | 0.023            | 0.31             | <0.21                                                                                                      | ----      | 0.018            | 0.21             |
| Benzo(k)fluoranthene                        | <0.31                                                                                                     | ----      | 0.028            | 0.31             | <0.21                                                                                                      | ----      | 0.021            | 0.21             |
| Benzo(a)pyrene                              | <0.31                                                                                                     | ----      | 0.018            | 0.31             | <0.14                                                                                                      | ----      | 0.015            | 0.14             |
| Indeno(1.2.3.cd)pyrene                      | <0.31                                                                                                     | ----      | 0.027            | 0.31             | <0.14                                                                                                      | ----      | 0.023            | 0.14             |
| Dibenzo(a,h)anthracene                      | <0.31                                                                                                     | ----      | 0.025            | 0.31             | <0.14                                                                                                      | ----      | 0.021            | 0.14             |
| Benzo(g,h,i)perylene                        | <0.31                                                                                                     | ----      | 0.024            | 0.31             | <0.21                                                                                                      | ----      | 0.017            | 0.21             |
| Σ 16PAH lowerbound                          | 23                                                                                                        |           |                  |                  | 21                                                                                                         |           |                  |                  |
| Σ 16PAH upperbound                          | 35                                                                                                        |           |                  |                  | 32                                                                                                         |           |                  |                  |

- Measurement uncertainty (MU) is expressed as expanded measurement uncertainty with coverage factor  $k = 2$ , representing 95% confidence.
- The limits of quantification (LOQ) are defined as the fivefold of the detection limits (LOD) for PAH which haven't positive blank or as the fivefold of the blank for PAH which have positive blank.
- The limit of detection is defined as the amount of analyte producing a signal with  $S/N \geq 3$ .
- The value of the detection limit is mentioned as the actual value at the acquisition date.
- Estimation of uncertainty PAH is 30% for each PAH and 20% for summation parameters.
- These values were ensured by analyses of certified reference material under conditions of internal reproducibility. Results marked "<" are lower than the LOD or LOQ.
- Levels „Lowerbound" a „Upperbound" are defined in Regulation 589/2014 and EN 1948-4.

#### Brief Method Summaries PAHs in muscle tissue of the FISH samples

| Analytical Methods | Method Descriptions                                                                                                                                                                                                                                                                                                                                                                                                                                                                                                                                                                                                                                                              |
|--------------------|----------------------------------------------------------------------------------------------------------------------------------------------------------------------------------------------------------------------------------------------------------------------------------------------------------------------------------------------------------------------------------------------------------------------------------------------------------------------------------------------------------------------------------------------------------------------------------------------------------------------------------------------------------------------------------|
| B-PAHHMS02         | <p>CZ_SOP_D06_06_180 - except chap. 11.3.3.1 - 11.3.3.7, 11.3.3.9 I, 11.3.4 (US EPA 429, ISO 11338, IP 346):</p> <p>Determination of polyaromatic hydrocarbons by isotope dilution method using HRGC -HRMS and calculation of polyaromatic hydrocarbons sums from measured values.</p> <p>The samples were stored in laboratory in the darkness and under temperature &lt;4°C.</p> <p>Actual LOQ are noticed in the attachment.</p> <p>Estimation of measurement uncertainty (95% confidential interval) for each individual PAH is 30%, for sum of PAH4 and PAH16 is 20%.</p> <p>QC Level: ALS CR Standard Quality Control Schedule (ALS Laboratory, Czech Republic, s.r.o)</p> |

Table S2-2a. Measurement details for *dl*-PCB congener analysis in muscle tissue of the FISH samples.

| PCB dioxin-like                                                              | <i>Notothenia coriiceps</i>                                             |           |                  |                  |                                          |                                          |
|------------------------------------------------------------------------------|-------------------------------------------------------------------------|-----------|------------------|------------------|------------------------------------------|------------------------------------------|
|                                                                              | Sample weight: 3.25 g, Final extract vol.: 250 µL, Injection vol.: 4 µL |           |                  |                  |                                          |                                          |
| Acquisition Date:<br>13 Nov 2016                                             | Result<br>(pg/g dw)                                                     | MU<br>(%) | LOD<br>(pg/g dw) | LOQ<br>(pg/g dw) | WHO 2005<br>TEFs                         | WHO-TEQ<br>Upperbound<br>(pg/g dw)       |
| PCB 77                                                                       | <37                                                                     | ----      | 1.4              | 37               | 0.0001                                   | 0.0037                                   |
| PCB 81                                                                       | <2.8                                                                    | ----      | 2.8              | 9.2              | 0.0003                                   | 0.00083                                  |
| PCB 126                                                                      | <4.5                                                                    | ----      | 4.5              | 15               | 0.1                                      | 0.45                                     |
| PCB 169                                                                      | <3.1                                                                    | ----      | 3.1              | 10               | 0.03                                     | 0.092                                    |
| PCB 105                                                                      | 5500 ±30.0                                                              |           | 3.9              | 350              | 0.00003                                  | 0.16                                     |
| PCB 114                                                                      | <29                                                                     | ----      | 3.8              | 29               | 0.00003                                  | 0.00086                                  |
| PCB 118                                                                      | 15000 ±30.0                                                             |           | 2.9              | 740              | 0.00003                                  | 0.46                                     |
| PCB 123                                                                      | <18                                                                     | ----      | 4.1              | 18               | 0.00003                                  | 0.00055                                  |
| PCB 156                                                                      | 4000 ±30.0                                                              |           | 1.9              | 110              | 0.00003                                  | 0.12                                     |
| PCB 157                                                                      | 1000 ±30.0                                                              |           | 2                | 10               | 0.00003                                  | 0.031                                    |
| PCB 167                                                                      | 1000 ±30.0                                                              |           | 1.8              | 52               | 0.00003                                  | 0.031                                    |
| PCB 189                                                                      | 93 ±30.0                                                                |           | 2.6              | 13               | 0.00003                                  | 0.0028                                   |
| WHO-TEQ from quantified PCBs lowerbound                                      |                                                                         |           |                  |                  |                                          | 0.81                                     |
| WHO-TEQ from quantified, 0.5 LOD and 0.5 LOQ non quantified PCBs mediumbound |                                                                         |           |                  |                  |                                          | 1.1                                      |
| WHO-TEQ from quantified, LOD and LOQ non quantified PCBs upperbound          |                                                                         |           |                  |                  |                                          | 1.4                                      |
|                                                                              | Result<br>(ng/g dw)                                                     | MU<br>(%) | LOD<br>(ng/g dw) | LOQ<br>(ng/g dw) | ΣindicatorPCB<br>Lowerbound<br>(ng/g dw) | ΣindicatorPCB<br>Upperbound<br>(ng/g dw) |
| PCB 28                                                                       | <0.52                                                                   | ----      | 0.001            | 0.52             | 0                                        | 0.52                                     |
| PCB 52                                                                       | <0.87                                                                   | ----      | 0.0012           | 0.87             | 0                                        | 0.87                                     |
| PCB 101                                                                      | 7.9 ±30.0                                                               |           | 0.0053           | 1.6              | 7.9                                      | 7.9                                      |
| PCB 138                                                                      | 17 ±30.0                                                                |           | 0.0018           | 1.5              | 17                                       | 17                                       |
| PCB 153                                                                      | 29 ±30.0                                                                |           | 0.0022           | 1.9              | 29                                       | 29                                       |
| PCB 180                                                                      | 5.5 ±30.0                                                               |           | 0.0028           | 0.73             | 5.5                                      | 5.5                                      |
| Σindicator PCB6 lowerbound                                                   |                                                                         |           |                  |                  | 59                                       |                                          |
| Σindicator PCB6 upperbound                                                   |                                                                         |           |                  |                  |                                          | 60                                       |

- Measurement uncertainty (MU) is expressed as a double  $k = 2$  relative standard deviation (RSD%), and corresponds to 95% confidence interval.
- Estimation of uncertainty of each PCB congener is 30%, total WHO-TEQ and sum of PCB6 is 20%. These values were ensured by analysis of certified reference material under conditions of internal reproducibility.
- The limits of quantification (LOQ) are defined on the base of blank level.
- The limit of detection is defined as the amount of analyte producing a signal with  $S/N \geq 3$ .
- The value of the detection limit is mentioned as the actual value at the acquisition date.
- Limit of detection (LOD) is equal to LOQ according to Commission Regulation (EU) No 589/2014.
- These values were ensured by analyses of certified reference material under conditions of internal reproducibility.
- Results marked "<" are lower than the LOD or LOQ.
- Levels 'Lowerbound' a 'Upperbound' are defined in Regulation 589/2014 and EN 1948-4, while Mediumbound is defined in Regulation 589/2014.

Table S2-2b. Measurement details for *dl*-PCB congener analysis in muscle tissue of the FISH samples.

| PCB dioxin-like<br>Acquisition Date:<br>13 Nov 2016                          | <i>Trematomus bernacchii</i><br>Sample weight: 7.02 g, Final extract vol.: 250 µL, Injection vol.: 4 µL |           |                  |                  |                                          |                                          |
|------------------------------------------------------------------------------|---------------------------------------------------------------------------------------------------------|-----------|------------------|------------------|------------------------------------------|------------------------------------------|
|                                                                              | Result<br>(pg/g dw)                                                                                     | MU<br>(%) | LOD<br>(pg/g dw) | LOQ<br>(pg/g dw) | WHO 2005<br>TEFs                         | WHO-TEQ<br>Upperbound<br>(pg/g dw)       |
| PCB 77                                                                       | 83 ±30.0                                                                                                |           | 0.57             | 63               | 0.0001                                   | 0.0083                                   |
| PCB 81                                                                       | <8.8 ----                                                                                               |           | 0.47             | 8.8              | 0.0003                                   | 0.0026                                   |
| PCB 126                                                                      | 36 ±30.0                                                                                                |           | 0.73             | 2.4              | 0.1                                      | 3.6                                      |
| PCB 169                                                                      | <0.58 ----                                                                                              |           | 0.58             | 1.9              | 0.03                                     | 0.017                                    |
| PCB 105                                                                      | 32000 ±30.0                                                                                             |           | 0.73             | 160              | 0.00003                                  | 0.97                                     |
| PCB 114                                                                      | 680 ±30.0                                                                                               |           | 0.6              | 14               | 0.00003                                  | 0.02                                     |
| PCB 118                                                                      | 110000 ±30.0                                                                                            |           | 0.65             | 340              | 0.00003                                  | 3.2                                      |
| PCB 123                                                                      | 600 ±30.0                                                                                               |           | 0.59             | 5.6              | 0.00003                                  | 0.018                                    |
| PCB 156                                                                      | 12000 ±30.0                                                                                             |           | 0.72             | 51               | 0.00003                                  | 0.35                                     |
| PCB 157                                                                      | 1900 ±30.0                                                                                              |           | 0.6              | 4.7              | 0.00003                                  | 0.057                                    |
| PCB 167                                                                      | 3400 ±30.0                                                                                              |           | 0.61             | 24               | 0.00003                                  | 0.1                                      |
| PCB 189                                                                      | 230 ±30.0                                                                                               |           | 0.85             | 5.9              | 0.00003                                  | 0.0069                                   |
| WHO-TEQ from quantified PCBs lowerbound                                      |                                                                                                         |           |                  |                  |                                          | 8.3                                      |
| WHO-TEQ from quantified, 0.5 LOD and 0.5 LOQ non quantified PCBs mediumbound |                                                                                                         |           |                  |                  |                                          | 8.3                                      |
| WHO-TEQ from quantified, LOD and LOQ non quantified PCBs upperbound          |                                                                                                         |           |                  |                  |                                          | 8.3                                      |
|                                                                              | Result<br>(ng/g dw)                                                                                     | MU<br>(%) | LOD<br>(ng/g dw) | LOQ<br>(ng/g dw) | ΣindicatorPCB<br>Lowerbound<br>(ng/g dw) | ΣindicatorPCB<br>Upperbound<br>(ng/g dw) |
| PCB 28                                                                       | <1.1 ----                                                                                               |           | 0.00036          | 1.1              | 0                                        | 1.1                                      |
| PCB 52                                                                       | 3 ±30.0                                                                                                 |           | 0.00046          | 0.69             | 3                                        | 3                                        |
| PCB 101                                                                      | 47 ±30.0                                                                                                |           | 0.00081          | 0.74             | 47                                       | 47                                       |
| PCB 138                                                                      | 49 ±30.0                                                                                                |           | 0.00069          | 0.69             | 49                                       | 49                                       |
| PCB 153                                                                      | 64 ±30.0                                                                                                |           | 0.00074          | 0.9              | 64                                       | 64                                       |
| PCB 180                                                                      | 10 ±30.0                                                                                                |           | 0.00077          | 0.34             | 10                                       | 10                                       |
| Σindicator PCB6 lowerbound                                                   |                                                                                                         |           |                  |                  | 170                                      |                                          |
| Σindicator PCB6 upperbound                                                   |                                                                                                         |           |                  |                  |                                          | 170                                      |

- Measurement uncertainty (MU) is expressed as a double  $k = 2$  relative standard deviation (RSD%), and corresponds to 95% confidence interval.
- Estimation of uncertainty of each PCB congener is 30%, total WHO-TEQ and sum of PCB6 is 20%. These values were ensured by analysis of certified reference material under conditions of internal reproducibility.
- The limits of quantification (LOQ) are defined on the base of blank level.
- The limit of detection is defined as the amount of analyte producing a signal with  $S/N \geq 3$ .
- The value of the detection limit is mentioned as the actual value at the acquisition date.
- Limit of detection (LOD) is equal to LOQ according to Commission Regulation (EU) No 589/2014.
- These values were ensured by analyses of certified reference material under conditions of internal reproducibility.
- Results marked "<" are lower than the LOD or LOQ.
- Levels 'Lowerbound' a 'Upperbound' are defined in Regulation 589/2014 and EN 1948-4, while Mediumbound is defined in Regulation 589/2014.

Brief Method Summaries *dl*-PCBs in muscle tissue of the FISH samples

| Analytical Methods | Method Descriptions                                                                                                                                                                                                                                                                                                                                                                                                                                                                                                                                                                                                                                   |
|--------------------|-------------------------------------------------------------------------------------------------------------------------------------------------------------------------------------------------------------------------------------------------------------------------------------------------------------------------------------------------------------------------------------------------------------------------------------------------------------------------------------------------------------------------------------------------------------------------------------------------------------------------------------------------------|
| B-PCBHMS02         | <p>CZ SOP D06_06_173 - except chap. 11.2.3.1-11.2.3.5., 11.2.3.71, 11.2.4 (US EPA 1668, modified): Determination of polychlorinated biphenyls by isotope dilution method using HRGC-HRMS and calculation of PCB sums and TEQ parameter from measured values.</p> <p>The samples were stored in laboratory in the darkness and under temperature &lt;4°C.</p> <p>Actual LOQ are noticed in the attachment.</p> <p>Estimation of measurement uncertainty (95% confidential interval) for each PCB congener is 30%, for total WHO-TEQs and is 20%.</p> <p>QC Level: ALS CR Standard Quality Control Schedule (ALS Laboratory, Czech Republic, s.r.o)</p> |

Table S2-3. Measurement details for PAH congener analysis in thallus and rhizoid of the MOSS samples.

| Polycyclic Aromatics<br>Hydrocarbons (PAHs) | <i>Polytrichum briedel</i> (thallus)<br>Weight:22.2g, Dry matter: 92.8%<br>Final extract vol.: 1000 µL<br>Injection vol.:2 µL |      |           |           | <i>Polytrichum briedel</i> (rhizoide)<br>Weight:21.6 g, Dry matter: 91.4%<br>Final extract vol.: 1000 µL<br>Injection vol.:2 µL |      |           |           |
|---------------------------------------------|-------------------------------------------------------------------------------------------------------------------------------|------|-----------|-----------|---------------------------------------------------------------------------------------------------------------------------------|------|-----------|-----------|
|                                             | Result                                                                                                                        | MU   | LOD       | LOQ       | Result                                                                                                                          | MU   | LOD       | LOQ       |
|                                             | (ng/g dw)                                                                                                                     | (%)  | (ng/g dw) | (ng/g dw) | (ng/g dw)                                                                                                                       | (%)  | (ng/g dw) | (ng/g dw) |
| Acquisition Date:<br>12 Jul 2017            |                                                                                                                               |      |           |           |                                                                                                                                 |      |           |           |
| Naphthalene                                 | <4.1                                                                                                                          | ---- | 0.0038    | 4.10      | <5.3                                                                                                                            | ---- | 0.0058    | 5.30      |
| Acenaphthylene                              | <0.24                                                                                                                         | ---- | 0.0092    | 0.24      | <0.33                                                                                                                           | ---- | 0.013     | 0.33      |
| Acenaphthene                                | <0.27                                                                                                                         | ---- | 0.0086    | 0.27      | <0.43                                                                                                                           | ---- | 0.012     | 0.43      |
| Fluorene                                    | <0.27                                                                                                                         | ---- | 0.012     | 0.27      | <1.4                                                                                                                            | ---- | 0.017     | 1.40      |
| Phenanthrene                                | <2.2                                                                                                                          | ---- | 0.0038    | 2.20      | <6.3                                                                                                                            | ---- | 0.0048    | 6.30      |
| Anthracene                                  | <0.36                                                                                                                         | ---- | 0.005     | 0.36      | <1                                                                                                                              | ---- | 0.0062    | 1.00      |
| Fluoranthene                                | <0.88                                                                                                                         | ---- | 0.0035    | 0.88      | <2.3                                                                                                                            | ---- | 0.0052    | 2.30      |
| Pyrene                                      | <0.9                                                                                                                          | ---- | 0.0031    | 0.90      | <4.3                                                                                                                            | ---- | 0.0047    | 4.30      |
| Benz(a)anthracene                           | <0.24                                                                                                                         | ---- | 0.0033    | 0.24      | <0.38                                                                                                                           | ---- | 0.0058    | 0.38      |
| Chrysene                                    | <0.36                                                                                                                         | ---- | 0.0034    | 0.36      | <0.38                                                                                                                           | ---- | 0.005     | 0.38      |
| Benzo(b)fluoranthene                        | <0.24                                                                                                                         | ---- | 0.0055    | 0.24      | <0.38                                                                                                                           | ---- | 0.012     | 0.38      |
| Benzo(k)fluoranthene                        | <0.24                                                                                                                         | ---- | 0.0066    | 0.24      | <0.38                                                                                                                           | ---- | 0.014     | 0.38      |
| Benzo(a)pyrene                              | <0.24                                                                                                                         | ---- | 0.0057    | 0.24      | <0.25                                                                                                                           | ---- | 0.012     | 0.25      |
| Indeno(1.2.3.cd)pyrene                      | <0.24                                                                                                                         | ---- | 0.015     | 0.24      | <0.25                                                                                                                           | ---- | 0.017     | 0.25      |
| Dibenzo(a,h)anthracene                      | <0.24                                                                                                                         | ---- | 0.012     | 0.24      | <0.25                                                                                                                           | ---- | 0.021     | 0.25      |
| Benzo(g,h,i)perylene                        | <0.24                                                                                                                         | ---- | 0.011     | 0.24      | <0.25                                                                                                                           | ---- | 0.02      | 0.25      |
| Σ 16PAH lowerbound                          | 0                                                                                                                             |      |           |           | 0                                                                                                                               |      |           |           |
| Σ 16PAH upperbound                          | 11                                                                                                                            |      |           |           | 24                                                                                                                              |      |           |           |

- Measurement uncertainty (MU) is expressed as expanded measurement uncertainty with coverage factor  $k = 2$ , representing 95% confidence interval.
- The limits of quantification (LOQ) are defined as the fivefold of the detection limits (LOD) for PAH which haven't positive blank or as the fivefold of the blank for PAH which have positive blank.
- The limit of detection is defined as the amount of analyte producing a signal with  $S/N \geq 3$ .
- The value of the detection limit is mentioned as the actual value at the acquisition date.
- Estimation of uncertainty PAH is 30% for each PAH and 20% for summation parameters.
- These values were ensured by analyses of certified reference material under conditions of internal reproducibility. Results marked "<" are lower than the LOD or LOQ.
- Levels 'Lowerbound' a 'Upperbound' are defined in Regulation 589/2014 and EN 1948-4.

## Brief Method Summaries PAHs in thallus and rhizoid of the MOSS samples

| Analytical Methods | Method Descriptions                                                                                                                                                                                                                                                                                                                                                                                                                                                                                                                                                                                                                                                  |
|--------------------|----------------------------------------------------------------------------------------------------------------------------------------------------------------------------------------------------------------------------------------------------------------------------------------------------------------------------------------------------------------------------------------------------------------------------------------------------------------------------------------------------------------------------------------------------------------------------------------------------------------------------------------------------------------------|
| B-PAHHMS02         | <p>CZ_SOP_D06_06_180 except chap. 10.3.3.1 - 10.3.3.8 (US EPA 429-modified, STN EN 16619-modified):</p> <p>Determination of polycyclic aromatic hydrocarbons by isotope dilution method using HRGC -HRMS and calculation of polyaromatic hydrocarbons sums from measured values.</p> <p>The samples were stored in laboratory in the darkness and under temperature &lt;4°C.</p> <p>Actual LOQ are noticed in the attachment.</p> <p>Estimation of measurement uncertainty (95% confidential interval) for each individual PAH is 30%, for sum of PAH4 is 20%.</p> <p>QC Level: ALS CR Standard Quality Control Schedule (ALS Laboratory, Czech Republic, s.r.o)</p> |

Table S2-4a. Measurement details for *dl*-PCB congener analysis in thallus of the MOSS samples.

| PCB dioxin-like                                                              | Polytrichum briedel (thallus)<br>sample weight:22.2g, Dry matter: 92.8%<br>Final extract vol.: 250 µL<br>Injection vol.:4 µL |                     |           |                  |                  |                  |                                    |
|------------------------------------------------------------------------------|------------------------------------------------------------------------------------------------------------------------------|---------------------|-----------|------------------|------------------|------------------|------------------------------------|
|                                                                              | Acquisition Date:<br>13 Jul 2017                                                                                             | Result<br>(pg/g dw) | MU<br>(%) | LOD<br>(pg/g dw) | LOQ<br>(pg/g dw) | WHO 2005<br>TEFs | WHO-TEQ<br>Upperbound<br>(pg/g dw) |
| PCB 77                                                                       | <3.2                                                                                                                         | ----                | 0.21      | 3.2              | 0.0001           | 0.00032          |                                    |
| PCB 81                                                                       | <0.31                                                                                                                        | ----                | 0.31      | 1                | 0.0003           | 0.000093         |                                    |
| PCB 126                                                                      | <0.51                                                                                                                        | ----                | 0.51      | 1.7              | 0.1              | 0.051            |                                    |
| PCB 169                                                                      | <0.037                                                                                                                       | ----                | 0.037     | 0.12             | 0.03             | 0.0011           |                                    |
| PCB 105                                                                      | <5.8                                                                                                                         | ----                | 0.11      | 5.8              | 0.00003          | 0.00018          |                                    |
| PCB 114                                                                      | <0.39                                                                                                                        | ----                | 0.11      | 0.39             | 0.00003          | 0.000012         |                                    |
| PCB 118                                                                      | <9.2                                                                                                                         | ----                | 0.089     | 9.2              | 0.00003          | 0.00028          |                                    |
| PCB 123                                                                      | <0.44                                                                                                                        | ----                | 0.099     | 0.44             | 0.00003          | 0.000013         |                                    |
| PCB 156                                                                      | <2.7                                                                                                                         | ----                | 0.29      | 2.7              | 0.00003          | 0.000082         |                                    |
| PCB 157                                                                      | <0.28                                                                                                                        | ----                | 0.28      | 0.94             | 0.00003          | 0.0000085        |                                    |
| PCB 167                                                                      | <0.67                                                                                                                        | ----                | 0.67      | 2.2              | 0.00003          | 0.00002          |                                    |
| PCB 189                                                                      | <1.9                                                                                                                         | ----                | 0.18      | 1.9              | 0.00003          | 0.000058         |                                    |
| WHO-TEQ from quantified PCBs lowerbound                                      |                                                                                                                              |                     |           |                  |                  |                  | 0                                  |
| WHO-TEQ from quantified, 0.5 LOD and 0.5 LOQ non quantified PCBs mediumbound |                                                                                                                              |                     |           |                  |                  |                  | 0.026                              |
| WHO-TEQ from quantified, LOD and LOQ non quantified PCBs upperbound          |                                                                                                                              |                     |           |                  |                  |                  | 0.053                              |

- Measurement uncertainty (MU) is expressed as a double  $k = 2$  relative standard deviation (RSD%), and corresponds to 95% confidence interval.
- Estimation of uncertainty of each PCB congener is 30%, total WHO-TEQ and sum of PCB6 is 20%. These values were ensured by analysis of certified reference material under conditions of internal reproducibility.
- The limits of quantification (LOQ) are defined on the base of blank level.
- The limit of detection is defined as the amount of analyte producing a signal with  $S/N \geq 3$ .
- The value of the detection limit is mentioned as the actual value at the acquisition date.
- Limit of detection (LOD) is equal to LOQ according to Commission Regulation (EU) No 589/2014.
- These values were ensured by analyses of certified reference material under conditions of internal reproducibility.
- Results marked "<" are lower than the LOD or LOQ.
- Levels 'Lowerbound' a 'Upperbound' are defined in Regulation 589/2014 and EN 1948-4, while Mediumbound is defined in Regulation 589/2014.

Table S2-4b. Measurement details for *dl*-PCB congener analysis in rhizoide of the MOSS samples.

| PCB dioxin-like                                                              | Polytrichum briedel (rhizoide)<br>sample weight:21.6g, Dry matter: 91.4%<br>Final extract vol.: 250 µL<br>Injection vol.:4 µL |                     |           |                  |                  |                  |                                    |
|------------------------------------------------------------------------------|-------------------------------------------------------------------------------------------------------------------------------|---------------------|-----------|------------------|------------------|------------------|------------------------------------|
|                                                                              | Acquisition Date:<br>13 Jul 2017                                                                                              | Result<br>(pg/g dw) | MU<br>(%) | LOD<br>(pg/g dw) | LOQ<br>(pg/g dw) | WHO 2005<br>TEFs | WHO-TEQ<br>Upperbound<br>(pg/g dw) |
| PCB 77                                                                       |                                                                                                                               | <3.4                | ----      | 0.37             | 3.4              | 0.0001           | 0.00034                            |
| PCB 81                                                                       |                                                                                                                               | <0.56               | ----      | 0.56             | 1.9              | 0.0003           | 0.00017                            |
| PCB 126                                                                      |                                                                                                                               | <0.48               | ----      | 0.48             | 1.6              | 0.1              | 0.048                              |
| PCB 169                                                                      |                                                                                                                               | <0.3                | ----      | 0.30             | 1                | 0.03             | 0.009                              |
| PCB 105                                                                      |                                                                                                                               | <9.6                | ----      | 0.20             | 9.6              | 0.00003          | 0.00029                            |
| PCB 114                                                                      |                                                                                                                               | <0.67               | ----      | 0.20             | 0.67             | 0.00003          | 0.00002                            |
| PCB 118                                                                      |                                                                                                                               | <9.7                | ----      | 0.20             | 9.7              | 0.00003          | 0.00029                            |
| PCB 123                                                                      |                                                                                                                               | <0.71               | ----      | 0.21             | 0.71             | 0.00003          | 0.000021                           |
| PCB 156                                                                      |                                                                                                                               | <5.1                | ----      | 0.14             | 5.1              | 0.00003          | 0.00015                            |
| PCB 157                                                                      |                                                                                                                               | <1.2                | ----      | 0.12             | 1.2              | 0.00003          | 0.000037                           |
| PCB 167                                                                      |                                                                                                                               | <3                  | ----      | 0.40             | 3                | 0.00003          | 0.000091                           |
| PCB 189                                                                      |                                                                                                                               | <0.33               | ----      | 0.33             | 1.1              | 0.00003          | 0.000098                           |
| WHO-TEQ from quantified PCBs lowerbound                                      |                                                                                                                               |                     |           |                  |                  |                  | 0                                  |
| WHO-TEQ from quantified, 0.5 LOD and 0.5 LOQ non quantified PCBs mediumbound |                                                                                                                               |                     |           |                  |                  |                  | 0.029                              |
| WHO-TEQ from quantified, LOD and LOQ non quantified PCBs upperbound          |                                                                                                                               |                     |           |                  |                  |                  | 0.058                              |

- Measurement uncertainty (MU) is expressed as a double  $k = 2$  relative standard deviation (RSD%), and corresponds to 95% confidence interval.
- Estimation of uncertainty of each PCB congener is 30%, total WHO-TEQ and sum of PCB6 is 20%. These values were ensured by analysis of certified reference material under conditions of internal reproducibility.
- The limits of quantification (LOQ) are defined on the base of blank level.
- The limit of detection is defined as the amount of analyte producing a signal with  $S/N \geq 3$ .
- The value of the detection limit is mentioned as the actual value at the acquisition date.
- Limit of detection (LOD) is equal to LOQ according to Commission Regulation (EU) No 589/2014.
- These values were ensured by analyses of certified reference material under conditions of internal reproducibility.
- Results marked "<" are lower than the LOD or LOQ.
- Levels 'Lowerbound' a 'Upperbound' are defined in Regulation 589/2014 and EN 1948-4, while Mediumbound is defined in Regulation 589/2014.

Brief Method Summaries *dl*-PCBs in thallus and rhizoid of the MOSS samples

| Analytical Methods | Method Descriptions                                                                                                                                                                                                                                                                                                                                                                                                                                                                                                                                                                                                                                               |
|--------------------|-------------------------------------------------------------------------------------------------------------------------------------------------------------------------------------------------------------------------------------------------------------------------------------------------------------------------------------------------------------------------------------------------------------------------------------------------------------------------------------------------------------------------------------------------------------------------------------------------------------------------------------------------------------------|
| B-PCBHMS02         | <p>CZ_SOP_D06_06_173 - except chap. 10.2.3.1-10.2.3.6 (US EPA 1668-modified, CSN P CEN/TS 16190-modified):</p> <p>Determination of polychlorinated biphenyls by isotope dilution method using HRGC -HRMS and calculation of PCB sums and TEQ parameter from measured values.</p> <p>The samples were stored in laboratory in the darkness and under temperature &lt;4°C.</p> <p>Actual LOQ are noticed in the attachment.</p> <p>Estimation of measurement uncertainty (95% confidential interval) for each PCB congener is 30%, for total WHO-TEQs is 20%.</p> <p>QC Level: ALS CR Standard Quality Control Schedule (ALS Laboratory, Czech Republic, s.r.o)</p> |

Table S2-5a. Measurement details for PAH congener analysis in the SEDIMENT samples.

| Polycyclic Aromatics<br>Hydrocarbons (PAHs) | Sediment (Station 2 – St2)                                                                      |           |                  |                  | Sediment (Station 3 – St3)                                                                     |           |                  |                  |
|---------------------------------------------|-------------------------------------------------------------------------------------------------|-----------|------------------|------------------|------------------------------------------------------------------------------------------------|-----------|------------------|------------------|
|                                             | Sample weight:4.19 g, Dry matter %: 98.4<br>Final extract vol.: 1000 µL,<br>Injection vol.:2 µL |           |                  |                  | sample weight:3.20 g Dry matter %: 98.6<br>Final extract vol.: 1000 µL,<br>Injection vol.:2 µL |           |                  |                  |
| Acquisition Date:<br>7-8-9 Nov 2016         | Result<br>(ng/g dw)                                                                             | MU<br>(%) | LOD<br>(ng/g dw) | LOQ<br>(ng/g dw) | Result<br>(ng/g dw)                                                                            | MU<br>(%) | LOD<br>(ng/g dw) | LOQ<br>(ng/g dw) |
| Naphthalene                                 | <0.049                                                                                          | ----      | 0.00024          | 0.049            | <0.15                                                                                          | ----      | 0.00058          | 0.15             |
| Acenaphthylene                              | <0.0036                                                                                         | ----      | 0.00015          | 0.0036           | <0.012                                                                                         | ----      | 0.00025          | 0.012            |
| Acenaphthene                                | <0.0049                                                                                         | ----      | 0.00021          | 0.0049           | <0.014                                                                                         | ----      | 0.00033          | 0.014            |
| Fluorene                                    | <0.061                                                                                          | ----      | 0.00025          | 0.061            | <0.095                                                                                         | ----      | 0.0004           | 0.095            |
| Phenanthrene                                | <0.03                                                                                           | ----      | 0.000017         | 0.03             | <0.035                                                                                         | ----      | 0.0000099        | 0.035            |
| Anthracene                                  | <0.003                                                                                          | ----      | 0.000021         | 0.003            | <0.004                                                                                         | ----      | 0.000013         | 0.004            |
| Fluoranthene                                | <0.02                                                                                           | ----      | 0.000013         | 0.02             | <0.017                                                                                         | ----      | 0.0000059        | 0.017            |
| Pyrene                                      | <0.018                                                                                          | ----      | 0.000011         | 0.018            | <0.016                                                                                         | ----      | 0.0000052        | 0.016            |
| Benz(a)anthracene                           | <0.0061                                                                                         | ----      | 0.000017         | 0.0061           | <0.0048                                                                                        | ----      | 0.0000063        | 0.0048           |
| Chrysene                                    | <0.0073                                                                                         | ----      | 0.00002          | 0.0073           | <0.0063                                                                                        | ----      | 0.0000074        | 0.0063           |
| Benzo(b)fluoranthene                        | <0.0085                                                                                         | ----      | 0.000023         | 0.0085           | <0.0063                                                                                        | ----      | 0.0000084        | 0.0063           |
| Benzo(k)fluoranthene                        | <0.0067                                                                                         | ----      | 0.000028         | 0.0067           | <0.004                                                                                         | ----      | 0.00001          | 0.004            |
| Benzo(a)pyrene                              | <0.0067                                                                                         | ----      | 0.000022         | 0.0067           | <0.0048                                                                                        | ----      | 0.0000079        | 0.0048           |
| Indeno(1.2.3.cd)pyrene                      | <0.0061                                                                                         | ----      | 0.000034         | 0.0061           | <0.004                                                                                         | ----      | 0.000012         | 0.004            |
| Dibenzo(a,h)anthracene                      | <0.0024                                                                                         | ----      | 0.000036         | 0.0024           | <0.0016                                                                                        | ----      | 0.000012         | 0.0016           |
| Benzo(g,h,i)perylene                        | <0.0051                                                                                         | ----      | 0.000023         | 0.0051           | <0.004                                                                                         | ----      | 0.0000079        | 0.004            |
| Σ 16PAH lowerbound                          | 0                                                                                               |           |                  |                  | 0                                                                                              |           |                  |                  |
| Σ 16PAH upperbound                          | 0.24                                                                                            |           |                  |                  | 0.37                                                                                           |           |                  |                  |

- Measurement uncertainty (MU) is expressed as a double ( $k = 2$ ) relative standard deviation (RSD%), and corresponds to 95% confidence interval.
- The limits of quantification (LOQ) are defined as the fivefold of the detection limits (LOD) for PAH which haven't positive blank or as the fivefold of the blank for PAH which have positive blank.
- The limit of detection is defined as the amount of analyte producing a signal with  $S/N \geq 3$ .
- The value of the detection limit is mentioned as the actual value at the acquisition date.
- Estimation of uncertainty PAH is 30% for each PAH and 20% for summation parameters.
- These values were ensured by analyses of certified reference material under conditions of internal reproducibility.
- Results marked "<" are lower than the LOD or LOQ.
- Levels 'Lowerbound' a 'Upperbound' are defined in Regulation 589/2014 and EN 1948-4.

Table S2-5b. Measurement details for PAH congener analysis in the SEDIMENT samples.

| Polycyclic Aromatics<br>Hydrocarbons (PAHs) | Sediment (Station 4 – St4)                                                                      |           |                  |                  | Sediment (Station 5 – St5)                                                                     |           |                  |                  |
|---------------------------------------------|-------------------------------------------------------------------------------------------------|-----------|------------------|------------------|------------------------------------------------------------------------------------------------|-----------|------------------|------------------|
|                                             | Sample weight:3.85 g, Dry matter %: 99.0<br>Final extract vol.: 1000 µL,<br>Injection vol.:2 µL |           |                  |                  | sample weight:3.90 g Dry matter %: 98.7<br>Final extract vol.: 1000 µL,<br>Injection vol.:2 µL |           |                  |                  |
| Acquisition Date:<br>7-8-9 Nov 2016         | Result<br>(ng/g dw)                                                                             | MU<br>(%) | LOD<br>(ng/g dw) | LOQ<br>(ng/g dw) | Result<br>(ng/g dw)                                                                            | MU<br>(%) | LOD<br>(ng/g dw) | LOQ<br>(ng/g dw) |
| Naphthalene                                 | <0.011                                                                                          | ----      | 0.000022         | 0.011            | <0.013                                                                                         | ----      | 0.00008          | 0.013            |
| Acenaphthylene                              | <0.0011                                                                                         | ----      | 0.000029         | 0.0011           | <0.0019                                                                                        | ----      | 0.000094         | 0.0019           |
| Acenaphthene                                | <0.0011                                                                                         | ----      | 0.000039         | 0.0011           | <0.0026                                                                                        | ----      | 0.00013          | 0.0026           |
| Fluorene                                    | <0.059                                                                                          | ----      | 0.000047         | 0.059            | <0.019                                                                                         | ----      | 0.00015          | 0.019            |
| Phenanthrene                                | <0.014                                                                                          | ----      | 0.0000097        | 0.014            | <0.019                                                                                         | ----      | 0.000039         | 0.019            |
| Anthracene                                  | <0.00092                                                                                        | ----      | 0.000012         | 0.00092          | <0.0013                                                                                        | ----      | 0.00005          | 0.0013           |
| Fluoranthene                                | <0.0046                                                                                         | ----      | 0.00001          | 0.0046           | <0.013                                                                                         | ----      | 0.000043         | 0.013            |
| Pyrene                                      | <0.0059                                                                                         | ----      | 0.0000091        | 0.0059           | <0.014                                                                                         | ----      | 0.000038         | 0.014            |
| Benz(a)anthracene                           | <0.00066                                                                                        | ----      | 0.000012         | 0.00066          | <0.0052                                                                                        | ----      | 0.000055         | 0.0052           |
| Chrysene                                    | <0.00066                                                                                        | ----      | 0.000013         | 0.00066          | <0.0052                                                                                        | ----      | 0.00006          | 0.0052           |
| Benzo(b)fluoranthene                        | <0.00092                                                                                        | ----      | 0.000015         | 0.00092          | <0.0058                                                                                        | ----      | 0.00007          | 0.0058           |
| Benzo(k)fluoranthene                        | <0.00066                                                                                        | ----      | 0.000018         | 0.00066          | <0.0052                                                                                        | ----      | 0.000083         | 0.0052           |
| Benzo(a)pyrene                              | <0.00066                                                                                        | ----      | 0.000017         | 0.00066          | <0.0052                                                                                        | ----      | 0.000068         | 0.0052           |
| Indeno(1.2.3.cd)pyrene                      | <0.00053                                                                                        | ----      | 0.000026         | 0.00053          | <0.0052                                                                                        | ----      | 0.0001           | 0.0052           |
| Dibenzo(a,h)anthracene                      | <0.00026                                                                                        | ----      | 0.000023         | 0.00026          | <0.0013                                                                                        | ----      | 0.00011          | 0.0013           |
| Benzo(g,h,i)perylene                        | <0.00066                                                                                        | ----      | 0.000017         | 0.00066          | <0.0039                                                                                        | ----      | 0.000057         | 0.0039           |
| Σ 16PAH lowerbound                          | 0                                                                                               |           |                  |                  | 0                                                                                              |           |                  |                  |
| Σ 16PAH upperbound                          | 0.1                                                                                             |           |                  |                  | 0.12                                                                                           |           |                  |                  |

- Measurement uncertainty (MU) is expressed as a double ( $k = 2$ ) relative standard deviation (RSD%), and corresponds to 95% confidence interval.
- The limits of quantification (LOQ) are defined as the fivefold of the detection limits (LOD) for PAH which haven't positive blank or as the fivefold of the blank for PAH which have positive blank.
- The limit of detection is defined as the amount of analyte producing a signal with  $S/N \geq 3$ .
- The value of the detection limit is mentioned as the actual value at the acquisition date.
- Estimation of uncertainty PAH is 30% for each PAH and 20% for summation parameters.
- These values were ensured by analyses of certified reference material under conditions of internal reproducibility.
- Results marked "<" are lower than the LOD or LOQ.
- Levels 'Lowerbound' a 'Upperbound' are defined in Regulation 589/2014 and EN 1948-4.



Table S2-5c. Measurement details for PAH congener analysis in the SEDIMENT samples.

| Polycyclic Aromatics Hydrocarbons (PAHs) | Sediment (Station 6 – St6)                                                                        |           |                  |                  |
|------------------------------------------|---------------------------------------------------------------------------------------------------|-----------|------------------|------------------|
|                                          | Sample weight: 3.91 g, Dry matter %: 97.9<br>Final extract vol.: 1000 µL,<br>Injection vol.: 2 µL |           |                  |                  |
| Acquisition Date:<br>7-8-9 Nov 2016      | Result<br>(ng/g dw)                                                                               | MU<br>(%) | LOD<br>(ng/g dw) | LOQ<br>(ng/g dw) |
| Naphthalene                              | <0.013                                                                                            | ----      | 0.000053         | 0.013            |
| Acenaphthylene                           | <0.002                                                                                            | ----      | 0.00011          | 0.002            |
| Acenaphthene                             | <0.0046                                                                                           | ----      | 0.00014          | 0.0046           |
| Fluorene                                 | <0.047                                                                                            | ----      | 0.00017          | 0.047            |
| Phenanthrene                             | <0.033                                                                                            | ----      | 0.000048         | 0.033            |
| Anthracene                               | <0.0018                                                                                           | ----      | 0.000061         | 0.0018           |
| Fluoranthene                             | <0.01                                                                                             | ----      | 0.000057         | 0.01             |
| Pyrene                                   | <0.014                                                                                            | ----      | 0.00005          | 0.014            |
| Benz(a)anthracene                        | <0.0033                                                                                           | ----      | 0.00007          | 0.0033           |
| Chrysene                                 | <0.0021                                                                                           | ----      | 0.000066         | 0.0021           |
| Benzo(b)fluoranthene                     | <0.0033                                                                                           | ----      | 0.000099         | 0.0033           |
| Benzo(k)fluoranthene                     | <0.0026                                                                                           | ----      | 0.00012          | 0.0026           |
| Benzo(a)pyrene                           | <0.0026                                                                                           | ----      | 0.000086         | 0.0026           |
| Indeno(1.2.3.cd)pyrene                   | <0.0026                                                                                           | ----      | 0.00013          | 0.0026           |
| Dibenzo(a,h)anthracene                   | <0.0013                                                                                           | ----      | 0.00013          | 0.0013           |
| Benzo(g,h,i)perylene                     | <0.0034                                                                                           | ----      | 0.000093         | 0.0034           |
| Σ 16PAH lowerbound                       | 0                                                                                                 |           |                  |                  |
| Σ 16PAH upperbound                       | 0.15                                                                                              |           |                  |                  |

- Measurement uncertainty (MU) is expressed as a double ( $k = 2$ ) relative standard deviation (RSD%), and corresponds to 95% confidence interval.
- The limits of quantification (LOQ) are defined as the fivefold of the detection limits (LOD) for PAH which haven't positive blank or as the fivefold of the blank for PAH which have positive blank.
- The limit of detection is defined as the amount of analyte producing a signal with  $S/N \geq 3$ .
- The value of the detection limit is mentioned as the actual value at the acquisition date.
- Estimation of uncertainty PAH is 30% for each PAH and 20% for summation parameters.
- These values were ensured by analyses of certified reference material under conditions of internal reproducibility.
- Results marked "<" are lower than the LOD or LOQ.
- Levels 'Lowerbound' a 'Upperbound' are defined in Regulation 589/2014 and EN 1948-4.

## Brief Method Summaries PAHs in the SEDIMENT samples

| Analytical Methods | Method Descriptions                                                                                                                                                                                                                                                                                                                                                                                                                                                                                                                                                                                                                                     |
|--------------------|---------------------------------------------------------------------------------------------------------------------------------------------------------------------------------------------------------------------------------------------------------------------------------------------------------------------------------------------------------------------------------------------------------------------------------------------------------------------------------------------------------------------------------------------------------------------------------------------------------------------------------------------------------|
| S-PAHHMS02         | CZ_SOP_D06_06_180 except chap. 11.3.3.1 - 11.3.3.5, 11.3.3.7 - 11.3.3.9, 11.3.5, 11.3.6.1 e (US EPA 429, ISO 11338, US EPA 3540):<br>Determination of polyaromatic hydrocarbons by isotope dilution method using HRGC -HRMS and calculation of polyaromatic hydrocarbons sums from measured values.<br>The samples were stored in laboratory in the darkness and under temperature <4°C. Estimation of measurement uncertainty (95% confidential interval) for each individual PAH is 30%, for sum of PAH is 20%.<br>Actual LOQ are noticed in the table.<br>QC Level: ALS CR Standard Quality Control Schedule (ALS Laboratory, Czech Republic, s.r.o) |

Table S2-6a. Measurement details for *dl*-PCB congener analysis in the SEDIMENT samples.

| PCB dioxin-like                          | Sediment (Station 2 – St2)                                                                   |                  |                  |                                 |                                |                                |
|------------------------------------------|----------------------------------------------------------------------------------------------|------------------|------------------|---------------------------------|--------------------------------|--------------------------------|
|                                          | Sample weight:4.19 g, Dry matter: 98.4 %,<br>Final extract vol.: 250 µL, Injection vol.:4 µL |                  |                  |                                 |                                |                                |
| Acquisition Date:<br>12 Nov 2016         | Result<br>(ng/g dw)                                                                          | MU<br>(%)        | LOD<br>(ng/g dw) | LOQ<br>(ng/g dw)                | TEFs                           | TEQ<br>Upperbound<br>(ng/g dw) |
| PCB 77                                   | <0.088                                                                                       | ----             | 0.00073          | 0.088                           | 0.0005                         | 0.000044                       |
| PCB 81                                   | <0.00083                                                                                     | ----             | 0.00083          | 0.0028                          | -                              | 0                              |
| PCB 126                                  | <0.00071                                                                                     | ----             | 0.00071          | 0.0024                          | 0.1                            | 0.000071                       |
| PCB 169                                  | <0.0011                                                                                      | ----             | 0.0011           | 0.0035                          | 0.01                           | 0.000011                       |
| PCB 105                                  | <1.3                                                                                         | ----             | 0.00069          | 1.3                             | 0.0001                         | 0.00013                        |
| PCB 114                                  | <0.029                                                                                       | ----             | 0.0006           | 0.029                           | 0.0005                         | 0.000015                       |
| PCB 118                                  | <2.6                                                                                         | ----             | 0.00055          | 2.6                             | 0.0001                         | 0.00026                        |
| PCB 123                                  | <0.039                                                                                       | ----             | 0.00067          | 0.039                           | 0.0001                         | 0.0000039                      |
| PCB 156                                  | <0.17                                                                                        | ----             | 0.00088          | 0.17                            | 0.0005                         | 0.000085                       |
| PCB 157                                  | <0.063                                                                                       | ----             | 0.00093          | 0.063                           | 0.0005                         | 0.000032                       |
| PCB 167                                  | <0.097                                                                                       | ----             | 0.00092          | 0.097                           | 0.00001                        | 0.00000097                     |
| PCB 170                                  | <0.26                                                                                        | ----             | 0.0014           | 0.26                            | 0.0001                         | 0.000026                       |
| PCB 180                                  | <0.49                                                                                        | ----             | 0.0012           | 0.49                            | 0.00001                        | 0.0000049                      |
| PCB 189                                  | <0.0018                                                                                      | ----             | 0.0018           | 0.006                           | 0.0001                         | 0.00000018                     |
| TEQ from quantified PCBs lowerbound      |                                                                                              |                  |                  |                                 |                                | 0                              |
| TEQ from PCBs mediumbound                |                                                                                              |                  |                  |                                 |                                | 0.00034                        |
| Maximum possible TEQ upperbound          |                                                                                              |                  |                  |                                 |                                | 0.00068                        |
|                                          | Result<br>(ng/g dw)                                                                          | LOD<br>(ng/g dw) | LOQ<br>(ng/g dw) | Σindicator<br>PCB<br>Lowerbound | TEQ<br>Upperbound<br>(ng/g dw) |                                |
| PCB 28                                   | <0.47                                                                                        | 0.0006           | 0.47             | 0                               | 0.47                           |                                |
| PCB 52                                   | <1.1                                                                                         | 0.00072          | 1.1              | 0                               | 1.1                            |                                |
| PCB 101                                  | <1.8                                                                                         | 0.0009           | 1.8              | 0                               | 1.8                            |                                |
| PCB 118                                  | <2.6                                                                                         | 0.00055          | 2.6              | 0                               | 2.6                            |                                |
| PCB 138                                  | <1.6                                                                                         | 0.0012           | 1.6              | 0                               | 1.6                            |                                |
| PCB 153                                  | <1.7                                                                                         | 0.0012           | 1.7              | 0                               | 1.7                            |                                |
| PCB 180                                  | <0.49                                                                                        | 0.0012           | 0.49             | 0                               | 0.49                           |                                |
| Σindicator PCB6 lowerbound               |                                                                                              |                  |                  |                                 |                                | 0                              |
| Max. possible Σindicator PCB6 upperbound |                                                                                              |                  |                  |                                 |                                | 7.1                            |
| Σindicator PCB7 lowerbound               |                                                                                              |                  |                  |                                 |                                | 0                              |
| Max. possible Σindicator PCB7 upperbound |                                                                                              |                  |                  |                                 |                                | 9.7                            |

-Measurement uncertainty (MU) is expressed as a double  $k = 2$  relative standard deviation (RSD%), and corresponds to 95% confidence interval.

- Estimation of uncertainty of each PCB congener is 30%, total TEQ and PCB6/PCB7 is 20%. These values were ensured by analysis of certified reference material under conditions of internal reproducibility.

- The limits of quantification (LOQ) are defined on the base of blank level.

- The limit of detection is defined as the amount of analyte producing a signal with  $S/N \geq 3$ .

-The value of the detection limit is mentioned as the actual value at the acquisition date.

- Results marked "<" are lower than the LOD or LOQ.

- Levels 'Lowerbound' a 'Upperbound' are defined in Regulation 589/2014 and EN 1948-4, while Mediumbound is defined in Regulation 589/2014.

Table S2-6b. Measurement details for *dl*-PCB congener analysis in the SEDIMENT samples.

| PCB dioxin-like                          | Sediment (Station 3 – St3)                                                                  |                  |                  |                                 |                                |                                |
|------------------------------------------|---------------------------------------------------------------------------------------------|------------------|------------------|---------------------------------|--------------------------------|--------------------------------|
|                                          | Sample weight:3.20 g, Dry matter: 98.6%,<br>Final extract vol.: 250 µL, Injection vol.:4 µL |                  |                  |                                 |                                |                                |
| Acquisition Date:<br>12 Nov 2016         | Result<br>(ng/g dw)                                                                         | MU<br>(%)        | LOD<br>(ng/g dw) | LOQ<br>(ng/g dw)                | TEFs                           | TEQ<br>Upperbound<br>(ng/g dw) |
| PCB 77                                   | <0.036                                                                                      | ----             | 0.00095          | 0.036                           | 0.0005                         | 0.000018                       |
| PCB 81                                   | <0.0011                                                                                     | ----             | 0.0011           | 0.0037                          | -                              | 0                              |
| PCB 126                                  | <0.0011                                                                                     | ----             | 0.0011           | 0.0037                          | 0.1                            | 0.00011                        |
| PCB 169                                  | <0.0015                                                                                     | ----             | 0.0015           | 0.0049                          | 0.01                           | 0.000015                       |
| PCB 105                                  | <1.2                                                                                        | ----             | 0.001            | 1.2                             | 0.0001                         | 0.00012                        |
| PCB 114                                  | <0.031                                                                                      | ----             | 0.001            | 0.031                           | 0.0005                         | 0.000015                       |
| PCB 118                                  | <2.1                                                                                        | ----             | 0.00089          | 2.1                             | 0.0001                         | 0.00021                        |
| PCB 123                                  | <0.032                                                                                      | ----             | 0.0012           | 0.032                           | 0.0001                         | 0.0000032                      |
| PCB 156                                  | <0.22                                                                                       | ----             | 0.0014           | 0.22                            | 0.0005                         | 0.00011                        |
| PCB 157                                  | <0.044                                                                                      | ----             | 0.0013           | 0.044                           | 0.0005                         | 0.000022                       |
| PCB 167                                  | <0.13                                                                                       | ----             | 0.0014           | 0.13                            | 0.00001                        | 0.0000013                      |
| PCB 170                                  | <0.33                                                                                       | ----             | 0.0018           | 0.33                            | 0.0001                         | 0.000033                       |
| PCB 180                                  | <0.71                                                                                       | ----             | 0.0016           | 0.71                            | 0.00001                        | 0.0000071                      |
| PCB 189                                  | <0.0023                                                                                     | ----             | 0.0023           | 0.0077                          | 0.0001                         | 0.00000023                     |
| TEQ from quantified PCBs lowerbound      |                                                                                             |                  |                  |                                 |                                | 0                              |
| TEQ from PCBs mediumbound                |                                                                                             |                  |                  |                                 |                                | 0.00033                        |
| Maximum possible TEQ upperbound          |                                                                                             |                  |                  |                                 |                                | 0.00066                        |
|                                          | Result<br>(ng/g dw)                                                                         | LOD<br>(ng/g dw) | LOQ<br>(ng/g dw) | Σindicator<br>PCB<br>Lowerbound | TEQ<br>Upperbound<br>(ng/g dw) |                                |
| PCB 28                                   | <1.2                                                                                        | 0.001            | 1.2              | 0                               | 1.2                            |                                |
| PCB 52                                   | <1                                                                                          | 0.0012           | 1                | 0                               | 1                              |                                |
| PCB 101                                  | <1.7                                                                                        | 0.0016           | 1.7              | 0                               | 1.7                            |                                |
| PCB 118                                  | <2.1                                                                                        | 0.00089          | 2.1              | 0                               | 2.1                            |                                |
| PCB 138                                  | <1.6                                                                                        | 0.0014           | 1.6              | 0                               | 1.6                            |                                |
| PCB 153                                  | <2                                                                                          | 0.0014           | 2                | 0                               | 2                              |                                |
| PCB 180                                  | <0.71                                                                                       | 0.0016           | 0.71             | 0                               | 0.71                           |                                |
| Σindicator PCB6 lowerbound               |                                                                                             |                  |                  |                                 | 0                              |                                |
| Max. possible Σindicator PCB6 upperbound |                                                                                             |                  |                  |                                 |                                | 8.3                            |
| Σindicator PCB7 lowerbound               |                                                                                             |                  |                  |                                 | 0                              |                                |
| Max. possible Σindicator PCB7 upperbound |                                                                                             |                  |                  |                                 |                                | 10                             |

-Measurement uncertainty (MU) is expressed as a double  $k = 2$  relative standard deviation (RSD%), and corresponds to 95% confidence interval.

- Estimation of uncertainty of each PCB congener is 30%, total TEQ and PCB6/PCB7 is 20%. These values were ensured by analysis of certified reference material under conditions of internal reproducibility.

- The limits of quantification (LOQ) are defined on the base of blank level.

- The limit of detection is defined as the amount of analyte producing a signal with  $S/N \geq 3$ .

-The value of the detection limit is mentioned as the actual value at the acquisition date.

- Results marked "<" are lower than the LOD or LOQ.

- Levels 'Lowerbound' a 'Upperbound' are defined in Regulation 589/2014 and EN 1948-4, while Mediumbound is defined in Regulation 589/2014.

Table S2-6c. Measurement details for *dl*-PCB congener analysis in the SEDIMENT samples.

| PCB dioxin-like                          | Sediment (Station 4 – St4)                                                                   |                  |                  |                                 |                                |                                |
|------------------------------------------|----------------------------------------------------------------------------------------------|------------------|------------------|---------------------------------|--------------------------------|--------------------------------|
|                                          | Sample weight:3.85 g, Dry matter: 99.0 %,<br>Final extract vol.: 250 µL, Injection vol.:4 µL |                  |                  |                                 |                                |                                |
| Acquisition Date:<br>12 Nov 2016         | Result<br>(ng/g dw)                                                                          | MU<br>(%)        | LOD<br>(ng/g dw) | LOQ<br>(ng/g dw)                | TEFs                           | TEQ<br>Upperbound<br>(ng/g dw) |
| PCB 77                                   | <0.014                                                                                       | ----             | 0.0038           | 0.014                           | 0.0005                         | 0.0000072                      |
| PCB 81                                   | <0.0036                                                                                      | ----             | 0.0036           | 0.012                           | -                              | 0                              |
| PCB 126                                  | <0.0042                                                                                      | ----             | 0.0042           | 0.014                           | 0.1                            | 0.00042                        |
| PCB 169                                  | <0.0047                                                                                      | ----             | 0.0047           | 0.016                           | 0.01                           | 0.000047                       |
| PCB 105                                  | <0.17                                                                                        | ----             | 0.0037           | 0.17                            | 0.0001                         | 0.000017                       |
| PCB 114                                  | <0.0037                                                                                      | ----             | 0.0037           | 0.012                           | 0.0005                         | 0.0000019                      |
| PCB 118                                  | <0.36                                                                                        | ----             | 0.0031           | 0.36                            | 0.0001                         | 0.000036                       |
| PCB 123                                  | <0.0039                                                                                      | ----             | 0.0039           | 0.013                           | 0.0001                         | 0.00000039                     |
| PCB 156                                  | <0.0042                                                                                      | ----             | 0.0042           | 0.014                           | 0.0005                         | 0.0000021                      |
| PCB 157                                  | <0.0042                                                                                      | ----             | 0.0042           | 0.014                           | 0.0005                         | 0.0000021                      |
| PCB 167                                  | <0.0058                                                                                      | ----             | 0.0058           | 0.019                           | 0.00001                        | 0.000000058                    |
| PCB 170                                  | <0.0061                                                                                      | ----             | 0.0061           | 0.02                            | 0.0001                         | 0.00000061                     |
| PCB 180                                  | <0.032                                                                                       | ----             | 0.0054           | 0.032                           | 0.00001                        | 0.00000032                     |
| PCB 189                                  | <0.0066                                                                                      | ----             | 0.0066           | 0.022                           | 0.0001                         | 0.00000066                     |
| TEQ from quantified PCBs lowerbound      |                                                                                              |                  |                  |                                 |                                | 0                              |
| TEQ from PCBs mediumbound                |                                                                                              |                  |                  |                                 |                                | 0.00027                        |
| Maximum possible TEQ upperbound          |                                                                                              |                  |                  |                                 |                                | 0.00053                        |
|                                          | Result<br>(ng/g dw)                                                                          | LOD<br>(ng/g dw) | LOQ<br>(ng/g dw) | Σindicator<br>PCB<br>Lowerbound | TEQ<br>Upperbound<br>(ng/g dw) |                                |
| PCB 28                                   | <0.3                                                                                         | 0.0028           | 0.3              | 0                               | 0.3                            |                                |
| PCB 52                                   | <0.35                                                                                        | 0.0039           | 0.35             | 0                               | 0.35                           |                                |
| PCB 101                                  | <0.52                                                                                        | 0.0066           | 0.52             | 0                               | 0.52                           |                                |
| PCB 118                                  | <0.36                                                                                        | 0.0031           | 0.36             | 0                               | 0.36                           |                                |
| PCB 138                                  | <0.24                                                                                        | 0.0057           | 0.24             | 0                               | 0.24                           |                                |
| PCB 153                                  | <0.27                                                                                        | 0.0051           | 0.27             | 0                               | 0.27                           |                                |
| PCB 180                                  | <0.032                                                                                       | 0.0054           | 0.032            | 0                               | 0.032                          |                                |
| Σindicator PCB6 lowerbound               |                                                                                              |                  |                  |                                 |                                | 0                              |
| Max. possible Σindicator PCB6 upperbound |                                                                                              |                  |                  |                                 |                                | 1.7                            |
| Σindicator PCB7 lowerbound               |                                                                                              |                  |                  |                                 |                                | 0                              |
| Max. possible Σindicator PCB7 upperbound |                                                                                              |                  |                  |                                 |                                | 2.1                            |

-Measurement uncertainty (MU) is expressed as a double  $k = 2$  relative standard deviation (RSD%), and corresponds to 95% confidence interval.

- Estimation of uncertainty of each PCB congener is 30%, total TEQ and PCB6/PCB7 is 20%. These values were ensured by analysis of certified reference material under conditions of internal reproducibility.

- The limits of quantification (LOQ) are defined on the base of blank level.

- The limit of detection is defined as the amount of analyte producing a signal with  $S/N \geq 3$ .

-The value of the detection limit is mentioned as the actual value at the acquisition date.

- Results marked "<" are lower than the LOD or LOQ.

- Levels 'Lowerbound' a 'Upperbound' are defined in Regulation 589/2014 and EN 1948-4, while Mediumbound is defined in Regulation 589/2014.

Table S2-6d. Measurement details for *dl*-PCB congener analysis in the SEDIMENT samples.

| PCB dioxin-like                          | Sediment (Station 5 – St5)                                                                   |                  |                  |                                 |                                |                                |
|------------------------------------------|----------------------------------------------------------------------------------------------|------------------|------------------|---------------------------------|--------------------------------|--------------------------------|
|                                          | Sample weight:3.90 g, Dry matter: 98.7 %,<br>Final extract vol.: 250 µL, Injection vol.:4 µL |                  |                  |                                 |                                |                                |
| Acquisition Date:<br>12 Nov 2016         | Result<br>(ng/g dw)                                                                          | MU<br>(%)        | LOD<br>(ng/g dw) | LOQ<br>(ng/g dw)                | TEFs                           | TEQ<br>Upperbound<br>(ng/g dw) |
| PCB 77                                   | <0.0049                                                                                      | ----             | 0.0049           | 0.016                           | 0.0005                         | 0.0000025                      |
| PCB 81                                   | <0.0016                                                                                      | ----             | 0.0016           | 0.0052                          | -                              | 0                              |
| PCB 126                                  | <0.003                                                                                       | ----             | 0.003            | 0.0098                          | 0.1                            | 0.0003                         |
| PCB 169                                  | <0.0015                                                                                      | ----             | 0.0015           | 0.0051                          | 0.01                           | 0.000015                       |
| PCB 105                                  | <1                                                                                           | ----             | 0.0041           | 1                               | 0.0001                         | 0.0001                         |
| PCB 114                                  | <0.0013                                                                                      | ----             | 0.0013           | 0.0045                          | 0.0005                         | 0.00000067                     |
| PCB 118                                  | <1.8                                                                                         | ----             | 0.0012           | 1.8                             | 0.0001                         | 0.00018                        |
| PCB 123                                  | <0.0014                                                                                      | ----             | 0.0014           | 0.0047                          | 0.0001                         | 0.00000014                     |
| PCB 156                                  | <0.14                                                                                        | ----             | 0.0023           | 0.14                            | 0.0005                         | 0.00007                        |
| PCB 157                                  | <0.0026                                                                                      | ----             | 0.0026           | 0.0088                          | 0.0005                         | 0.0000013                      |
| PCB 167                                  | <0.044                                                                                       | ----             | 0.0011           | 0.044                           | 0.00001                        | 0.00000044                     |
| PCB 170                                  | <0.07                                                                                        | ----             | 0.0023           | 0.07                            | 0.0001                         | 0.000007                       |
| PCB 180                                  | <0.62                                                                                        | ----             | 0.0021           | 0.62                            | 0.00001                        | 0.0000062                      |
| PCB 189                                  | <0.0018                                                                                      | ----             | 0.0018           | 0.0059                          | 0.0001                         | 0.00000018                     |
| TEQ from quantified PCBs lowerbound      |                                                                                              |                  |                  |                                 |                                | 0                              |
| TEQ from PCBs mediumbound                |                                                                                              |                  |                  |                                 |                                | 0.00034                        |
| Maximum possible TEQ upperbound          |                                                                                              |                  |                  |                                 |                                | 0.00068                        |
|                                          | Result<br>(ng/g dw)                                                                          | LOD<br>(ng/g dw) | LOQ<br>(ng/g dw) | Σindicator<br>PCB<br>Lowerbound | TEQ<br>Upperbound<br>(ng/g dw) |                                |
| PCB 28                                   | <2.1                                                                                         | 0.0013           | 2.1              | 0                               | 2.1                            |                                |
| PCB 52                                   | <1.3                                                                                         | 0.0018           | 1.3              | 0                               | 1.3                            |                                |
| PCB 101                                  | <2.8                                                                                         | 0.0019           | 2.8              | 0                               | 2.8                            |                                |
| PCB 118                                  | <1.8                                                                                         | 0.0012           | 1.8              | 0                               | 1.8                            |                                |
| PCB 138                                  | <1.3                                                                                         | 0.0012           | 1.3              | 0                               | 1.3                            |                                |
| PCB 153                                  | <1.6                                                                                         | 0.00086          | 1.6              | 0                               | 1.6                            |                                |
| PCB 180                                  | <0.62                                                                                        | 0.0021           | 0.62             | 0                               | 0.62                           |                                |
| Σindicator PCB6 lowerbound               |                                                                                              |                  |                  |                                 | 0                              |                                |
| Max. possible Σindicator PCB6 upperbound |                                                                                              |                  |                  |                                 |                                | 9.7                            |
| Σindicator PCB7 lowerbound               |                                                                                              |                  |                  |                                 | 0                              |                                |
| Max. possible Σindicator PCB7 upperbound |                                                                                              |                  |                  |                                 |                                | 11                             |

-Measurement uncertainty (MU) is expressed as a double  $k = 2$  relative standard deviation (RSD%), and corresponds to 95% confidence interval.

- Estimation of uncertainty of each PCB congener is 30%, total TEQ and PCB6/PCB7 is 20%. These values were ensured by analysis of certified reference material under conditions of internal reproducibility.

- The limits of quantification (LOQ) are defined on the base of blank level.

- The limit of detection is defined as the amount of analyte producing a signal with  $S/N \geq 3$ .

-The value of the detection limit is mentioned as the actual value at the acquisition date.

- Results marked "<" are lower than the LOD or LOQ.

- Levels 'Lowerbound' a 'Upperbound' are defined in Regulation 589/2014 and EN 1948-4, while Mediumbound is defined in Regulation 589/2014.

Table S2-6e. Measurement details for *dl*-PCB congener analysis in the SEDIMENT samples.

| PCB dioxin-like<br><br>Acquisition Date:<br>12 Nov 2016 | Sediment (Station 6 – St6)<br>Sample weight:3.91 g, Dry matter: 97.9 %,<br>Final extract vol.: 250 µL, Injection vol.:4 µL |                  |                  |                                 |                                |                                |
|---------------------------------------------------------|----------------------------------------------------------------------------------------------------------------------------|------------------|------------------|---------------------------------|--------------------------------|--------------------------------|
|                                                         | Result<br>(ng/g dw)                                                                                                        | MU<br>(%)        | LOD<br>(ng/g dw) | LOQ<br>(ng/g dw)                | TEFs                           | TEQ<br>Upperbound<br>(ng/g dw) |
| PCB 77                                                  | <0.073                                                                                                                     | ----             | 0.0031           | 0.073                           | 0.0005                         | 0.000036                       |
| PCB 81                                                  | <0.0034                                                                                                                    | ----             | 0.0034           | 0.011                           | -                              | 0                              |
| PCB 126                                                 | <0.0028                                                                                                                    | ----             | 0.0028           | 0.0092                          | 0.1                            | 0.00028                        |
| PCB 169                                                 | <0.0042                                                                                                                    | ----             | 0.0042           | 0.014                           | 0.01                           | 0.000042                       |
| PCB 105                                                 | <0.37                                                                                                                      | ----             | 0.003            | 0.37                            | 0.0001                         | 0.000037                       |
| PCB 114                                                 | <0.0038                                                                                                                    | ----             | 0.0038           | 0.013                           | 0.0005                         | 0.0000019                      |
| PCB 118                                                 | <0.7                                                                                                                       | ----             | 0.003            | 0.7                             | 0.0001                         | 0.00007                        |
| PCB 123                                                 | <0.004                                                                                                                     | ----             | 0.004            | 0.013                           | 0.0001                         | 0.0000004                      |
| PCB 156                                                 | <0.094                                                                                                                     | ----             | 0.0037           | 0.094                           | 0.0005                         | 0.000047                       |
| PCB 157                                                 | <0.0036                                                                                                                    | ----             | 0.0036           | 0.012                           | 0.0005                         | 0.0000018                      |
| PCB 167                                                 | <0.044                                                                                                                     | ----             | 0.0038           | 0.044                           | 0.00001                        | 0.00000044                     |
| PCB 170                                                 | <0.2                                                                                                                       | ----             | 0.0052           | 0.2                             | 0.0001                         | 0.00002                        |
| PCB 180                                                 | <0.2                                                                                                                       | ----             | 0.0047           | 0.2                             | 0.00001                        | 0.000002                       |
| PCB 189                                                 | <0.0056                                                                                                                    | ----             | 0.0056           | 0.019                           | 0.0001                         | 0.00000056                     |
| TEQ from quantified PCBs lowerbound                     |                                                                                                                            |                  |                  |                                 |                                | 0                              |
| TEQ from PCBs mediumbound                               |                                                                                                                            |                  |                  |                                 |                                | 0.00027                        |
| Maximum possible TEQ upperbound                         |                                                                                                                            |                  |                  |                                 |                                | 0.00053                        |
|                                                         | Result<br>(ng/g dw)                                                                                                        | LOD<br>(ng/g dw) | LOQ<br>(ng/g dw) | Σindicator<br>PCB<br>Lowerbound | TEQ<br>Upperbound<br>(ng/g dw) |                                |
| PCB 28                                                  | <2.1                                                                                                                       | 0.0029           | 2.1              | 0                               | 2.1                            |                                |
| PCB 52                                                  | <2.2                                                                                                                       | 0.0037           | 2.2              | 0                               | 2.2                            |                                |
| PCB 101                                                 | <1.4                                                                                                                       | 0.0049           | 1.4              | 0                               | 1.4                            |                                |
| PCB 118                                                 | <0.7                                                                                                                       | 0.003            | 0.7              | 0                               | 0.7                            |                                |
| PCB 138                                                 | <0.86                                                                                                                      | 0.0041           | 0.86             | 0                               | 0.86                           |                                |
| PCB 153                                                 | <1                                                                                                                         | 0.0046           | 1                | 0                               | 1                              |                                |
| PCB 180                                                 | <0.2                                                                                                                       | 0.0047           | 0.2              | 0                               | 0.2                            |                                |
| Σindicator PCB6 lowerbound                              |                                                                                                                            |                  |                  |                                 | 0                              |                                |
| Max. possible Σindicator PCB6 upperbound                |                                                                                                                            |                  |                  |                                 |                                | 7.8                            |
| Σindicator PCB7 lowerbound                              |                                                                                                                            |                  |                  |                                 | 0                              |                                |
| Max. possible Σindicator PCB7 upperbound                |                                                                                                                            |                  |                  |                                 |                                | 8.5                            |

-Measurement uncertainty (MU) is expressed as a double  $k = 2$  relative standard deviation (RSD%), and corresponds to 95% confidence interval.

- Estimation of uncertainty of each PCB congener is 30%, total TEQ and PCB6/PCB7 is 20%. These values were ensured by analysis of certified reference material under conditions of internal reproducibility.

- The limits of quantification (LOQ) are defined on the base of blank level.

- The limit of detection is defined as the amount of analyte producing a signal with  $S/N \geq 3$ .

-The value of the detection limit is mentioned as the actual value at the acquisition date.

- Results marked "<" are lower than the LOD or LOQ.

- Levels 'Lowerbound' a 'Upperbound' are defined in Regulation 589/2014 and EN 1948-4, while Mediumbound is defined in Regulation 589/2014

#### Brief Method Summaries *dl*-PCBs in the SEDIMENT

| Analytical Methods | Method Descriptions                                                                                                                                                                                                                                                                                                                                                                                                                                             |
|--------------------|-----------------------------------------------------------------------------------------------------------------------------------------------------------------------------------------------------------------------------------------------------------------------------------------------------------------------------------------------------------------------------------------------------------------------------------------------------------------|
| S-PCBHMS01         | CZ_SOP_D06_06_172 (JIS K0311, modified): Determination of coplanar polychlorinated biphenyls in stationary emission sources by isotope dilution method using HRGC-HRMS and calculation of PCB sums and TEQ parameter from measured values. The samples were stored in laboratory in the darkness and under temperature <4°C. Actual LOQ are noticed in the table.<br>QC Level: ALS CR Standard Quality Control Schedule (ALS Laboratory, Czech Republic, s.r.o) |
