# Supplementary material
Source: MDPI journal article supplement (https://www.mdpi.com/2071-1050/14/7/3994)
Supplement: s1 [file s1]

## Supplementary Material – 1 (S1)

### QA/QC Data and Chromatography Conditions for Pesticide Compounds

Table S1-1. Recovery values of pesticide compounds in muscle tissue of the fish (*Notothenia. coriiceps*).

| Pesticide Congeners          | Spiked volume<br>(µg/kg) | Result<br>(µg/kg) | Recovery<br>(%) |
|------------------------------|--------------------------|-------------------|-----------------|
| Hexachlorobenzene (HCB)      | 10                       | 9,72              | 97,2            |
| Kresoxim-methyl              | 10                       | 9,75              | 97,5            |
| Procymidone                  | 10                       | 4,16              | 41,6            |
| Quinoxifen                   | 10                       | 6,72              | 67,2            |
| δ-BHC (HCH)                  | 5                        | 3,52              | 70,4            |
| Trifluralin                  | 10                       | 11,2              | 112             |
| 2,4'-DDD ( <i>o,p'</i> -DDD) | 5                        | 3,72              | 74,4            |
| 2,4'-DDE ( <i>o,p'</i> -DDE) | 5                        | 3,30              | 66,0            |
| 2,4'-DDT ( <i>o,p'</i> -DDT) | 5                        | 3,71              | 74,2            |
| 4,4'-DDD ( <i>p,p'</i> -DDD) | 5                        | 2,81              | 56,2            |
| 4,4'-DDE ( <i>p,p'</i> -DDE) | 5                        | 3,28              | 65,6            |
| 4,4'-DDT ( <i>p,p'</i> -DDT) | 5                        | 3,20              | 64,0            |
| Bromophos methyl             | 10                       | 8,00              | 80,0            |
| Bromophos-ethyl              | 10                       | 7,66              | 76,6            |
| Chlordan gamma               | 10                       | 8,00              | 80,0            |
| Chlorpyrifos-ethyl           | 5                        | 4,46              | 89,2            |
| Heptachlor                   | 7                        | 6,30              | 90,0            |
| Lindane (γ-HCH)              | 5                        | 3,52              | 70,4            |
| Mecarbam                     | 10                       | 9,22              | 92,2            |
| Methoxychlor                 | 10                       | 6,77              | 67,7            |
| Pyridaben                    | 10                       | 8,59              | 85,9            |

Table S1-2. Pesticide concentrations (ng/g-dw) in the thallus of *Polytrichum briedel* and *Andreaea regularis* and surface sediment samples collected from the vicinity of Galindez Island and Vernadsky Research Base.

| Pesticide<br>Congeners                       | Moss              |                     | Sediment |           |           |           |           |
|----------------------------------------------|-------------------|---------------------|----------|-----------|-----------|-----------|-----------|
|                                              | <i>P. briedel</i> | <i>A. regularis</i> | Station2 | Station 3 | Station 4 | Station 5 | Station 6 |
| Hexachlorobenzene                            | <1.0              | <1.0                | <1.0     | <1.0      | <1.0      | <1.0      | <1.0      |
| Kresoxim-methyl <sup>f, *</sup>              | <2.0              | <2.0                | <2.0     | <2.0      | <2.0      | <2.0      | <2.0      |
| Procymidone <sup>f, #</sup>                  | <1.0              | <1.0                | <1.0     | <1.0      | <1.0      | <1.0      | <1.0      |
| Quinoxifen <sup>f, #</sup>                   | <1.0              | <1.0                | <1.0     | <1.0      | <1.0      | <1.0      | <1.0      |
| $\delta$ -BHC (HCH) <sup>h, #</sup>          | <1.0              | <1.0                | <1.0     | <1.0      | <1.0      | <1.0      | <1.0      |
| Trifluralin <sup>h, #</sup>                  | <1.0              | <1.0                | <1.0     | <1.0      | <1.0      | <1.0      | <1.0      |
| 2,4'-DDD ( <i>o,p'</i> -DDD) <sup>i, #</sup> | <1.0              | <1.0                | <1.0     | <1.0      | <1.0      | <1.0      | <1.0      |
| 2,4'-DDE ( <i>o,p'</i> -DDE) <sup>i, -</sup> | <1.0              | <1.0                | <1.0     | <1.0      | <1.0      | <1.0      | <1.0      |
| 2,4'-DDT ( <i>o,p'</i> -DDT) <sup>i, #</sup> | <1.0              | <1.0                | <1.0     | <1.0      | <1.0      | <1.0      | <1.0      |
| 4,4'-DDD ( <i>p,p'</i> -DDD) <sup>i, #</sup> | <1.0              | <1.0                | <1.0     | <1.0      | <1.0      | <1.0      | <1.0      |
| 4,4'-DDE ( <i>p,p'</i> -DDE) <sup>i, #</sup> | <1.0              | <1.0                | <1.0     | <1.0      | <1.0      | <1.0      | <1.0      |
| 4,4'-DDT ( <i>p,p'</i> -DDT) <sup>i, #</sup> | <1.0              | <1.0                | <1.0     | <1.0      | <1.0      | <1.0      | <1.0      |
| Bromophos methyl <sup>i, #</sup>             | <1.0              | <1.0                | <1.0     | <1.0      | <1.0      | <1.0      | <1.0      |
| Bromophos-ethyl <sup>i, #</sup>              | <1.0              | <1.0                | <1.0     | <1.0      | <1.0      | <1.0      | <1.0      |
| Chlordan gamma <sup>i, #</sup>               | <1.0              | <1.0                | <1.0     | <1.0      | <1.0      | <1.0      | <1.0      |
| Chlorpyrifos-ethyl <sup>i, #</sup>           | <1.0              | <1.0                | <1.0     | <1.0      | <1.0      | <1.0      | <1.0      |
| Heptachlor <sup>i, #</sup>                   | <1.0              | <1.0                | <1.0     | <1.0      | <1.0      | <1.0      | <1.0      |
| Lindane ( $\gamma$ -HCH) <sup>i, #</sup>     | <1.0              | <1.0                | <1.0     | <1.0      | <1.0      | <1.0      | <1.0      |
| Mecarbam <sup>i, *</sup>                     | <2.0              | <2.0                | <2.0     | <2.0      | <2.0      | <2.0      | <2.0      |
| Methoxychlor <sup>i, #</sup>                 | <1.0              | <1.0                | <1.0     | <1.0      | <1.0      | <1.0      | <1.0      |
| Pyridaben <sup>i, *</sup>                    | <2.0              | <2.0                | <2.0     | <2.0      | <2.0      | <2.0      | <2.0      |

<sup>f</sup>: Fungicide, <sup>h</sup>: Herbicide, <sup>i</sup>: Insecticide, <sup>#</sup>: by GC-MS/MS, <sup>\*</sup>: by LC-MS/MS

Table S1-3. Chromatography operating conditions.

|             | GC (Thermo TSQ™ 9000)                                           | LC (Thermo UltiMate 3000)                     |
|-------------|-----------------------------------------------------------------|-----------------------------------------------|
| Column      | Thermo TG-5MS<br>(Length:30m, ID: 0.2mm, film thickness:0.25um) | Thermo Accucore aQ<br>(Dimension:100 * 2.1mm) |
| Flow        | Constant flow rate 1.3 mL/min                                   | 0.3 mL/min                                    |
| Temperature | 330/350 °C max                                                  | 35 °C constatatnt                             |
| Carrier gas | Helyum (Purity: 99.9999%)                                       |                                               |

Table S1-4. GC-MSMS oven program.

| #       | Rate (°C/min) | Temperature (°C) | Hold Time (min) |
|---------|---------------|------------------|-----------------|
| Initial |               | 90.0             | 1.00            |
| 1       | 30.0          | 150.0            | 1.00            |
| 2       | 10.0          | 190.0            | 2.00            |
| 3       | 10.0          | 220.0            | 0.00            |
| 4       | 10.0          | 250.0            | 0.00            |
| 5       | 10.0          | 285.0            | 5.00            |

Table S1-5. The list of Precursor Ion, Product Ion, Collision Energy, and Polarity of pesticide active substances used in the LC/MSMS analysis.

| Compound           | Precursor Ion<br>( <i>m/z</i> ) | Product Ion ( <i>m/z</i> ) | Collision<br>Energy (eV) | Polarity |
|--------------------|---------------------------------|----------------------------|--------------------------|----------|
| Acephate           | 184.01                          | 124.9                      | 20                       | 1        |
| Acephate           | 184.01                          | 143                        | 10                       | 1        |
| Acetamiprid        | 223.1                           | 90.2                       | 36                       | 1        |
| Acetamiprid        | 223.1                           | 126.1                      | 22                       | 1        |
| Acetochlor         | 270                             | 148                        | 15                       | 1        |
| Acetochlor         | 270                             | 224                        | 10                       | 1        |
| Acrinathrin        | 559                             | 181                        | 33                       | 1        |
| Acrinathrin        | 559                             | 208                        | 16                       | 1        |
| Aldicarb           | 208.1                           | 89.2                       | 17                       | 1        |
| Aldicarb           | 208.1                           | 116.1                      | 10                       | 1        |
| Aldicarb_Sulfone   | 240.12                          | 86.2                       | 22                       | 1        |
| Aldicarb_Sulfone   | 240.12                          | 148.05                     | 12                       | 1        |
| Aldicarb_Sulfoxide | 207                             | 89                         | 16                       | 1        |
| Aldicarb_Sulfoxide | 207                             | 132                        | 10                       | 1        |
| Amitraz            | 294                             | 122                        | 35                       | 1        |
| Amitraz            | 294                             | 163                        | 18                       | 1        |
| Atrazine           | 216                             | 104                        | 20                       | 1        |
| Atrazine           | 216                             | 174                        | 16                       | 1        |
| Azinphos_Ethyl     | 345.96                          | 132.1                      | 16                       | 1        |
| Azinphos_Ethyl     | 345.96                          | 160.1                      | 7                        | 1        |
| Azinphos-_Methyl   | 317.93                          | 125.03                     | 19                       | 1        |
| Azinphos-_Methyl   | 317.93                          | 260.98                     | 8                        | 1        |
| Azoxystrobin       | 404.12                          | 329.11                     | 32                       | 1        |
| Azoxystrobin       | 404.12                          | 372.14                     | 14                       | 1        |
| Benalaxyl          | 326.18                          | 148                        | 22                       | 1        |
| Benalaxyl          | 326.18                          | 208                        | 15                       | 1        |
| Benomyl            | 291                             | 160                        | 28                       | 1        |
| Benomyl            | 291                             | 192                        | 16                       | 1        |
| Bensulfuron_Methyl | 411                             | 119                        | 20                       | 1        |
| Bensulfuron_Methyl | 411                             | 149                        | 15                       | 1        |
| Bentazone          | 239.1                           | 132                        | 28                       | 0        |
| Bentazone          | 239.1                           | 197                        | 22                       | 0        |
| Bifentrin          | 440                             | 166                        | 42                       | 1        |
| Bifentrin          | 440                             | 181                        | 14                       | 1        |
| Bitertanol         | 338.08                          | 99                         | 16                       | 1        |
| Bitertanol         | 338.08                          | 269                        | 10                       | 1        |
| Boscalid           | 343.2                           | 271                        | 16                       | 1        |

| Compound            | Precursor Ion<br>( <i>m/z</i> ) | Product Ion ( <i>m/z</i> ) | Collision<br>Energy (eV) | Polarity |
|---------------------|---------------------------------|----------------------------|--------------------------|----------|
| Boscalid            | 343.2                           | 307                        | 10                       | 1        |
| Bromophos_Ethyl     | 395                             | 339                        | 20                       | 1        |
| Bromophos_Ethyl     | 395                             | 367                        | 20                       | 1        |
| Bromoxynil          | 276.07                          | 79                         | 36                       | 1        |
| Bromoxynil          | 276.07                          | 81                         | 36                       | 1        |
| Bromuconazole       | 377.92                          | 158.92                     | 28                       | 1        |
| Bromuconazole       | 377.92                          | 160.88                     | 28                       | 1        |
| Buprimate           | 317.3                           | 108.1                      | 27                       | 1        |
| Buprimate           | 317.3                           | 166.1                      | 25                       | 1        |
| Buprofezine         | 306.08                          | 116.1                      | 15                       | 1        |
| Buprofezine         | 306.08                          | 201.06                     | 10                       | 1        |
| Cadusafos           | 270.97                          | 97                         | 36                       | 1        |
| Cadusafos           | 270.97                          | 158.9                      | 16                       | 1        |
| Carbaryl            | 202.08                          | 127                        | 30                       | 1        |
| Carbaryl            | 202.08                          | 145                        | 12                       | 1        |
| Carbendazim         | 192.1                           | 132.1                      | 33                       | 1        |
| Carbendazim         | 192.1                           | 160.06                     | 20                       | 1        |
| Carbofuran          | 222.14                          | 123.1                      | 25                       | 1        |
| Carbofuran          | 222.14                          | 165.06                     | 14                       | 1        |
| Carbosulfan         | 381                             | 118                        | 25                       | 1        |
| Carbosulfan         | 381                             | 160                        | 25                       | 1        |
| Carboxin            | 235.95                          | 86.98                      | 24                       | 1        |
| Carboxin            | 235.95                          | 142.97                     | 17                       | 1        |
| Carfentrozen_Ethyl  | 412.2                           | 366.2                      | 19                       | 1        |
| Carfentrozen_Ethyl  | 412.2                           | 384                        | 15                       | 1        |
| Chlorfenvinphos     | 358.8                           | 99.1                       | 33                       | 1        |
| Chlorfenvinphos     | 358.8                           | 155.2                      | 14                       | 1        |
| Chlorfluazuron      | 539.9                           | 158.02                     | 20                       | 1        |
| Chlorfluazuron      | 539.9                           | 382.87                     | 20                       | 1        |
| Chloridazone        | 222                             | 92                         | 25                       | 1        |
| Chloridazone        | 222                             | 104                        | 25                       | 1        |
| Chlorpropham        | 214.2                           | 154                        | 18                       | 1        |
| Chlorpropham        | 214.2                           | 172                        | 8                        | 1        |
| Chlorpyrifos        | 349.9                           | 97                         | 34                       | 1        |
| Chlorpyrifos        | 349.9                           | 198                        | 20                       | 1        |
| Chlorpyrifos_Methyl | 322                             | 125                        | 20                       | 1        |
| Chlorpyrifos_Methyl | 322                             | 290                        | 16                       | 1        |
| Chlorsulfuron       | 358                             | 141                        | 15                       | 1        |

| Compound                   | Precursor Ion<br>( <i>m/z</i> ) | Product Ion ( <i>m/z</i> ) | Collision<br>Energy (eV) | Polarity |
|----------------------------|---------------------------------|----------------------------|--------------------------|----------|
| Chlorsulfuron              | 358                             | 167                        | 15                       | 1        |
| Clethodim                  | 360                             | 164                        | 18                       | 1        |
| Clethodim                  | 360                             | 268                        | 12                       | 1        |
| Clodinafob_Propargyl_Ester | 350                             | 91                         | 25                       | 1        |
| Clodinafob_Propargyl_Ester | 350                             | 266                        | 15                       | 1        |
| Clofentezine               | 302.9                           | 102                        | 20                       | 1        |
| Clofentezine               | 302.9                           | 137.9                      | 15                       | 1        |
| Cycloate                   | 216                             | 134                        | 10                       | 1        |
| Cycloate                   | 216                             | 154                        | 10                       | 1        |
| Cymoxanil                  | 199                             | 83                         | 23                       | 1        |
| Cymoxanil                  | 199                             | 128                        | 10                       | 1        |
| Cypermethrin               | 433                             | 127                        | 10                       | 1        |
| Cypermethrin               | 433                             | 191                        | 10                       | 1        |
| Cyproconazole              | 292.13                          | 70                         | 30                       | 1        |
| Cyproconazole              | 292.13                          | 125                        | 32                       | 1        |
| Cyprodinil                 | 226                             | 77                         | 20                       | 1        |
| Cyprodinil                 | 226                             | 93                         | 20                       | 1        |
| Deltamethrin               | 522.9                           | 280.7                      | 10                       | 1        |
| Deltamethrin               | 522.9                           | 506                        | 10                       | 1        |
| Demeton_S_Methyl           | 231                             | 61                         | 10                       | 1        |
| Demeton_S_Methyl           | 231                             | 89                         | 10                       | 1        |
| Diafenthiuron              | 385                             | 278                        | 15                       | 1        |
| Diafenthiuron              | 385                             | 329                        | 15                       | 1        |
| Dichlofluanid              | 349.98                          | 123.1                      | 39                       | 1        |
| Dichlofluanid              | 349.98                          | 224                        | 21                       | 1        |
| Diclofop_Methyl            | 358                             | 120                        | 10                       | 1        |
| Diclofop_Methyl            | 358                             | 281                        | 10                       | 1        |
| Dicrothophos               | 238                             | 112                        | 10                       | 1        |
| Dicrothophos               | 238                             | 193                        | 10                       | 1        |
| Diethofencarb              | 268                             | 180                        | 12                       | 1        |
| Diethofencarb              | 268                             | 226                        | 12                       | 1        |
| Difenoconazole             | 406                             | 111.1                      | 60                       | 1        |
| Difenoconazole             | 406                             | 251.1                      | 25                       | 1        |
| Dimethamorph               | 388.1                           | 165                        | 30                       | 1        |
| Dimethamorph               | 388.1                           | 300.98                     | 20                       | 1        |
| Dimethenamid               | 276                             | 168                        | 26                       | 1        |
| Dimethenamid               | 276                             | 244                        | 14                       | 1        |
| Dimethoate                 | 230.1                           | 125.15                     | 20                       | 1        |

| Compound         | Precursor Ion<br>( <i>m/z</i> ) | Product Ion ( <i>m/z</i> ) | Collision<br>Energy (eV) | Polarity |
|------------------|---------------------------------|----------------------------|--------------------------|----------|
| Dimethoate       | 230.1                           | 199.15                     | 10                       | 1        |
| Diniconazole     | 326                             | 70                         | 25                       | 1        |
| Diniconazole     | 326                             | 159                        | 34                       | 1        |
| Diphenamid       | 240                             | 118                        | 10                       | 1        |
| Diphenamid       | 240                             | 134                        | 10                       | 1        |
| Diuron           | 233.11                          | 46.3                       | 35                       | 1        |
| Diuron           | 233.11                          | 72                         | 20                       | 1        |
| Epoxiconazole    | 330.2                           | 121                        | 21                       | 1        |
| Epoxiconazole    | 330.2                           | 123                        | 20                       | 1        |
| Eptc             | 190.07                          | 86.2                       | 14                       | 1        |
| Eptc             | 190.07                          | 128.2                      | 13                       | 1        |
| Ethiofencarb     | 226.05                          | 107                        | 10                       | 1        |
| Ethiofencarb     | 226.05                          | 164                        | 10                       | 1        |
| Ethion           | 384.92                          | 97.09                      | 49                       | 1        |
| Ethion           | 384.92                          | 142.97                     | 29                       | 1        |
| Ethofumesate     | 304                             | 121                        | 22                       | 1        |
| Ethofumesate     | 304                             | 161                        | 24                       | 1        |
| Etofenprox       | 394                             | 107                        | 43                       | 1        |
| Etofenprox       | 394                             | 177                        | 15                       | 1        |
| Etoxazole        | 360                             | 140.97                     | 20                       | 1        |
| Etoxazole        | 360                             | 304.12                     | 20                       | 1        |
| Faderinlikadone  | 392.1                           | 238                        | 10                       | 1        |
| Faderinlikadone  | 392.1                           | 331.1                      | 10                       | 1        |
| Fenamidone       | 312.2                           | 236.2                      | 16                       | 1        |
| Fenamidone       | 312.2                           | 264.2                      | 12                       | 1        |
| Fenamiphos       | 304.03                          | 217.01                     | 24                       | 1        |
| Fenamiphos       | 304.03                          | 234.03                     | 8                        | 1        |
| Fenarimol        | 331                             | 258.7                      | 25                       | 1        |
| Fenarimol        | 331                             | 267.9                      | 25                       | 1        |
| Fenazaquin       | 307.2                           | 57.2                       | 25                       | 1        |
| Fenazaquin       | 307.2                           | 161                        | 19                       | 1        |
| Fenbuconazole    | 337                             | 70                         | 20                       | 1        |
| Fenbuconazole    | 337                             | 125                        | 36                       | 1        |
| Fenhexamid       | 302.09                          | 55                         | 36                       | 1        |
| Fenhexamid       | 302.09                          | 97                         | 26                       | 1        |
| Fenoxaprop_Ethyl | 362                             | 121                        | 15                       | 1        |
| Fenoxaprop_Ethyl | 362                             | 288                        | 10                       | 1        |
| Fenoxycarb       | 302.17                          | 88                         | 20                       | 1        |

| Compound                   | Precursor Ion<br>( <i>m/z</i> ) | Product Ion ( <i>m/z</i> ) | Collision<br>Energy (eV) | Polarity |
|----------------------------|---------------------------------|----------------------------|--------------------------|----------|
| Fenoxycarb                 | 302.17                          | 116                        | 13                       | 1        |
| Fenpropathrin              | 350.1                           | 97                         | 34                       | 1        |
| Fenpropathrin              | 350.1                           | 125                        | 30                       | 1        |
| Fenproximate               | 422                             | 135                        | 15                       | 1        |
| Fenproximate               | 422                             | 366                        | 10                       | 1        |
| Fluazifob_P_Buthyl         | 384                             | 282                        | 15                       | 1        |
| Fluazifob_P_Buthyl         | 384                             | 328                        | 10                       | 1        |
| Fluazinam                  | 463.19                          | 398                        | 17                       | 0        |
| Fluazinam                  | 463.19                          | 416                        | 20                       | 0        |
| Flufenoxuron               | 489                             | 141                        | 20                       | 1        |
| Flufenoxuron               | 489                             | 158                        | 20                       | 1        |
| Flurochloridone            | 312                             | 145                        | 10                       | 1        |
| Flurochloridone            | 312                             | 292                        | 10                       | 1        |
| Flusilazole                | 316.18                          | 165                        | 34                       | 1        |
| Flusilazole                | 316.18                          | 247.1                      | 19                       | 1        |
| Flutriafol                 | 302.16                          | 70.1                       | 19                       | 1        |
| Flutriafol                 | 302.16                          | 123                        | 33                       | 1        |
| Formetanate                | 222                             | 120                        | 10                       | 1        |
| Formetanate                | 222                             | 165                        | 10                       | 1        |
| Furathiocarb               | 383.1                           | 195                        | 15                       | 1        |
| Furathiocarb               | 383.1                           | 252                        | 15                       | 1        |
| Haloxfop_P_Methyl          | 376                             | 91.1                       | 32                       | 1        |
| Haloxfop_P_Methyl          | 376                             | 316.1                      | 18                       | 1        |
| Heptanophos                | 251                             | 109                        | 15                       | 1        |
| Heptanophos                | 251                             | 127                        | 10                       | 1        |
| Hexaconazole               | 314.14                          | 70.2                       | 20                       | 1        |
| Hexaconazole               | 314.14                          | 159                        | 20                       | 1        |
| Hexaflumuron               | 459                             | 276                        | 10                       | 0        |
| Hexaflumuron               | 459                             | 439                        | 10                       | 0        |
| Hexythiazox                | 353                             | 227.9                      | 10                       | 1        |
| Hexythiazox                | 353                             | 271                        | 10                       | 1        |
| Imidacloprid               | 256                             | 175                        | 15                       | 1        |
| Imidacloprid               | 256                             | 209                        | 10                       | 1        |
| Iodosulfuron_Methyl_Sodium | 508                             | 141                        | 10                       | 1        |
| Iodosulfuron_Methyl_Sodium | 508                             | 166.8                      | 10                       | 1        |
| Ioxynil                    | 369.8                           | 126.9                      | 35                       | 0        |
| Ioxynil                    | 369.8                           | 214.9                      | 30                       | 0        |
| Kresoxsim_Methyl           | 314.05                          | 206                        | 10                       | 1        |

| Compound         | Precursor Ion<br>( <i>m/z</i> ) | Product Ion ( <i>m/z</i> ) | Collision<br>Energy (eV) | Polarity |
|------------------|---------------------------------|----------------------------|--------------------------|----------|
| Kresoxsim_Methyl | 314.05                          | 267                        | 10                       | 1        |
| Lenacil          | 235                             | 135                        | 30                       | 1        |
| Lenacil          | 235                             | 136                        | 32                       | 1        |
| Lenacil          | 235                             | 153                        | 16                       | 1        |
| Linuron          | 249                             | 159.9                      | 20                       | 1        |
| Linuron          | 249                             | 181.9                      | 15                       | 1        |
| Lufenuron        | 511                             | 141                        | 20                       | 1        |
| Lufenuron        | 511                             | 158                        | 20                       | 1        |
| Malaoxon         | 315                             | 99                         | 10                       | 1        |
| Malaoxon         | 315                             | 127                        | 10                       | 1        |
| Malathion        | 330.97                          | 99.02                      | 25                       | 1        |
| Malathion        | 330.97                          | 126.99                     | 13                       | 1        |
| Mcpa             | 199                             | 141                        | 10                       | 0        |
| Mcpa             | 199                             | 142.5                      | 10                       | 0        |
| Mecarbam         | 330                             | 96.9                       | 25                       | 1        |
| Mecarbam         | 330                             | 226.9                      | 10                       | 1        |
| Metalaxyl        | 280.11                          | 192.1                      | 16                       | 1        |
| Metalaxyl        | 280.11                          | 220.1                      | 16                       | 1        |
| Metalaxyl_M      | 280                             | 160                        | 10                       | 1        |
| Metalaxyl_M      | 280                             | 220                        | 10                       | 1        |
| Metamitron       | 203                             | 174                        | 15                       | 1        |
| Metamitron       | 203                             | 175.1                      | 15                       | 1        |
| Methacrifos      | 258.05                          | 125.04                     | 25                       | 1        |
| Methacrifos      | 258.05                          | 209.01                     | 12                       | 1        |
| Methamidfos      | 142.03                          | 94                         | 15                       | 1        |
| Methamidfos      | 142.03                          | 112                        | 10                       | 1        |
| Methidathion     | 302.9                           | 85.2                       | 23                       | 1        |
| Methidathion     | 302.9                           | 144.92                     | 5                        | 1        |
| Methiocarb       | 226.02                          | 121.05                     | 15                       | 1        |
| Methiocarb       | 226.02                          | 168.95                     | 10                       | 1        |
| Methomyl         | 163.05                          | 88.1                       | 10                       | 1        |
| Methomyl         | 163.05                          | 106.1                      | 10                       | 1        |
| Metolachlor      | 284.05                          | 176                        | 25                       | 1        |
| Metolachlor      | 284.05                          | 252                        | 10                       | 1        |
| Mevinphos        | 225                             | 126.9                      | 15                       | 1        |
| Mevinphos        | 225                             | 192.9                      | 10                       | 1        |
| Molinate         | 188.06                          | 83.1                       | 20                       | 1        |
| Molinate         | 188.06                          | 126.2                      | 16                       | 1        |



| Compound          | Precursor Ion<br>( <i>m/z</i> ) | Product Ion ( <i>m/z</i> ) | Collision<br>Energy (eV) | Polarity |
|-------------------|---------------------------------|----------------------------|--------------------------|----------|
| Monocrothophos    | 224                             | 127.02                     | 15                       | 1        |
| Monocrothophos    | 224                             | 193.1                      | 10                       | 1        |
| Monolinuron       | 215                             | 99                         | 36                       | 1        |
| Monolinuron       | 215                             | 126                        | 17                       | 1        |
| Myclobutanil      | 289.13                          | 70.2                       | 19                       | 1        |
| Myclobutanil      | 289.13                          | 125                        | 31                       | 1        |
| Nicosulfuron      | 411                             | 106                        | 32                       | 1        |
| Nicosulfuron      | 411                             | 182                        | 22                       | 1        |
| Omethoate         | 214                             | 155                        | 18                       | 1        |
| Omethoate         | 214                             | 183                        | 13                       | 1        |
| Oxadixyl          | 279                             | 132                        | 25                       | 1        |
| Oxadixyl          | 279                             | 219                        | 15                       | 1        |
| Oxamyl            | 237.1                           | 72.08                      | 15                       | 1        |
| Oxamyl            | 237.1                           | 90.09                      | 10                       | 1        |
| Paraoxon_Ethyl    | 276                             | 94                         | 25                       | 1        |
| Paraoxon_Ethyl    | 276                             | 220                        | 10                       | 1        |
| Penconazole       | 284.12                          | 70.1                       | 17                       | 1        |
| Penconazole       | 284.12                          | 159                        | 35                       | 1        |
| Pendimethalin     | 282.05                          | 194                        | 10                       | 1        |
| Pendimethalin     | 282.05                          | 212                        | 10                       | 1        |
| Permethrin        | 408                             | 183                        | 22                       | 1        |
| Permethrin        | 408                             | 355                        | 10                       | 1        |
| Phenmedipham      | 301                             | 133                        | 10                       | 1        |
| Phenmedipham      | 301                             | 168                        | 10                       | 1        |
| Phenthoate        | 320.9                           | 163                        | 10                       | 1        |
| Phenthoate        | 320.9                           | 246.8                      | 10                       | 1        |
| Phorate           | 261                             | 75                         | 12                       | 1        |
| Phorate           | 261                             | 97                         | 32                       | 1        |
| Phosalone         | 368                             | 111                        | 42                       | 1        |
| Phosalone         | 368                             | 182                        | 14                       | 1        |
| Phosmet           | 318                             | 133                        | 39                       | 1        |
| Phosmet           | 318                             | 160                        | 15                       | 1        |
| Phospamidone      | 300                             | 127                        | 17                       | 1        |
| Phospamidone      | 300                             | 174                        | 15                       | 1        |
| Pirimicarb        | 239                             | 72                         | 21                       | 1        |
| Pirimicarb        | 239                             | 182                        | 16                       | 1        |
| Pirimiphos_Methyl | 306                             | 108                        | 34                       | 1        |
| Pirimiphos_Methyl | 306                             | 164                        | 24                       | 1        |

| Compound        | Precursor Ion<br>( <i>m/z</i> ) | Product Ion ( <i>m/z</i> ) | Collision<br>Energy (eV) | Polarity |
|-----------------|---------------------------------|----------------------------|--------------------------|----------|
| Primiphos_Ethyl | 334.07                          | 182.14                     | 26                       | 1        |
| Primiphos_Ethyl | 334.07                          | 198.11                     | 24                       | 1        |
| Prochloraz      | 376.2                           | 266                        | 15                       | 1        |
| Prochloraz      | 376.2                           | 308                        | 14                       | 1        |
| Profenofos      | 372.9                           | 144                        | 36                       | 1        |
| Profenofos      | 372.9                           | 302.8                      | 19                       | 1        |
| Profoxydim      | 466                             | 107                        | 25                       | 1        |
| Profoxydim      | 466                             | 180                        | 20                       | 1        |
| Promecarb       | 208.09                          | 109                        | 17                       | 1        |
| Promecarb       | 208.09                          | 151                        | 10                       | 1        |
| Prometryn       | 242.2                           | 157.9                      | 24                       | 1        |
| Prometryn       | 242.2                           | 199.9                      | 20                       | 1        |
| Propagite       | 368                             | 175                        | 10                       | 1        |
| Propagite       | 368                             | 231.05                     | 10                       | 1        |
| Propamocarb_Hcl | 189                             | 102                        | 10                       | 1        |
| Propamocarb_Hcl | 189                             | 144                        | 10                       | 1        |
| Propaquizofob   | 444                             | 99.9                       | 20                       | 1        |
| Propaquizofob   | 444                             | 371.1                      | 20                       | 1        |
| Propazine       | 230                             | 146                        | 24                       | 1        |
| Propazine       | 230                             | 188                        | 18                       | 1        |
| Propiconazole   | 342                             | 69                         | 25                       | 1        |
| Propiconazole   | 342                             | 158.8                      | 30                       | 1        |
| Propoxur        | 210                             | 111                        | 16                       | 1        |
| Propoxur        | 210                             | 168                        | 10                       | 1        |
| Prothiophos     | 345                             | 133                        | 25                       | 1        |
| Prothiophos     | 345                             | 161.05                     | 31                       | 1        |
| Pymetrozine     | 218                             | 79                         | 30                       | 1        |
| Pymetrozine     | 218                             | 105                        | 25                       | 1        |
| Pyrazophos      | 374                             | 221.9                      | 20                       | 1        |
| Pyrazophos      | 374                             | 345.9                      | 20                       | 1        |
| Pyridaben       | 365.05                          | 146.9                      | 15                       | 1        |
| Pyridaben       | 365.05                          | 309                        | 10                       | 1        |
| Pyridaphention  | 341                             | 188.9                      | 25                       | 1        |
| Pyridaphention  | 341                             | 204.9                      | 25                       | 1        |
| Pyridate        | 379.05                          | 206.8                      | 10                       | 1        |
| Pyridate        | 379.05                          | 351                        | 10                       | 1        |
| Pyrimethanil    | 200.07                          | 82                         | 30                       | 1        |
| Pyrimethanil    | 200.07                          | 107                        | 26                       | 1        |

| Compound         | Precursor Ion<br>( <i>m/z</i> ) | Product Ion ( <i>m/z</i> ) | Collision<br>Energy (eV) | Polarity |
|------------------|---------------------------------|----------------------------|--------------------------|----------|
| Pyriproxyfen     | 322.05                          | 96                         | 20                       | 1        |
| Pyriproxyfen     | 322.05                          | 185                        | 20                       | 1        |
| Quinalphos       | 299.05                          | 147.06                     | 24                       | 1        |
| Quinalphos       | 299.05                          | 163.01                     | 23                       | 1        |
| Quinoxifen       | 308                             | 162                        | 10                       | 1        |
| Quinoxifen       | 308                             | 197                        | 10                       | 1        |
| Quizalafop_Ethyl | 373                             | 91                         | 32                       | 1        |
| Quizalofop_Ethyl | 373                             | 299                        | 18                       | 1        |
| Rimsulfuron      | 432                             | 182                        | 22                       | 1        |
| Rimsulfuron      | 432                             | 325                        | 14                       | 1        |
| Simazine         | 202                             | 104                        | 27                       | 1        |
| Simazine         | 202                             | 132                        | 20                       | 1        |
| Spinosad         | 732.5                           | 98                         | 59                       | 1        |
| Spinosad         | 732.5                           | 142                        | 35                       | 1        |
| Spiroxamine      | 298                             | 100                        | 15                       | 1        |
| Spiroxamine      | 298                             | 144                        | 15                       | 1        |
| Tau_Fluvalinate  | 520.067                         | 181                        | 20                       | 1        |
| Tau_Fluvalinate  | 520.067                         | 208                        | 20                       | 1        |
| Tebuconazole     | 308.2                           | 70                         | 23                       | 1        |
| Tebuconazole     | 308.2                           | 125                        | 30                       | 1        |
| Tebufenozide     | 353.12                          | 133                        | 19                       | 1        |
| Tebufenozide     | 353.12                          | 297                        | 10                       | 1        |
| Tebufenpyrad     | 334.21                          | 117                        | 36                       | 1        |
| Tebufenpyrad     | 334.21                          | 145.2                      | 28                       | 1        |
| Tepraloxydim     | 342                             | 166                        | 20                       | 1        |
| Tepraloxydim     | 342                             | 250                        | 12                       | 1        |
| Terbufos         | 289                             | 57                         | 22                       | 1        |
| Terbufos         | 289                             | 103                        | 8                        | 1        |
| Terbuthylazine   | 230                             | 104                        | 25                       | 1        |
| Terbuthylazine   | 230                             | 174                        | 20                       | 1        |
| Terbutryn        | 242.16                          | 68                         | 40                       | 1        |
| Terbutryn        | 242.16                          | 186.2                      | 25                       | 1        |
| Tetraconazole    | 372                             | 70                         | 20                       | 1        |
| Tetraconazole    | 372                             | 159                        | 30                       | 1        |
| Thiabendazole    | 202                             | 131                        | 35                       | 1        |
| Thiabendazole    | 202                             | 175.05                     | 28                       | 1        |
| Thiacloprid      | 253.13                          | 90.2                       | 37                       | 1        |
| Thiacloprid      | 253.13                          | 126.1                      | 22                       | 1        |

| Compound               | Precursor Ion<br>( <i>m/z</i> ) | Product Ion ( <i>m/z</i> ) | Collision<br>Energy (eV) | Polarity |
|------------------------|---------------------------------|----------------------------|--------------------------|----------|
| Thiamethoxam           | 291.98                          | 181.03                     | 25                       | 1        |
| Thiamethoxam           | 291.98                          | 211.09                     | 10                       | 1        |
| Thiobencarb            | 258                             | 100.2                      | 10                       | 1        |
| Thiobencarb            | 258                             | 125                        | 15                       | 1        |
| Thiofensulfuron_Methyl | 388                             | 167                        | 15                       | 1        |
| Thiofensulfuron_Methyl | 388                             | 205                        | 15                       | 1        |
| Thiometon              | 247                             | 61                         | 10                       | 1        |
| Thiometon              | 247                             | 89                         | 10                       | 1        |
| Thiophanate_Methyl     | 343.15                          | 151.2                      | 27                       | 1        |
| Thiophanete_Methyl     | 343.15                          | 93.2                       | 46                       | 1        |
| Tolclofos_Methyl       | 301                             | 175                        | 29                       | 1        |
| Tolclofos_Methyl       | 301                             | 269                        | 10                       | 1        |
| Tolyfluanid            | 364.1                           | 137.2                      | 29                       | 1        |
| Tolyfluanid            | 364.1                           | 238                        | 35                       | 1        |
| Tralkoxydim            | 330                             | 137.9                      | 20                       | 1        |
| Tralkoxydim            | 330                             | 284.2                      | 15                       | 1        |
| Triadimefon            | 294                             | 197                        | 15                       | 1        |
| Triadimefon            | 294                             | 225                        | 20                       | 1        |
| Triadimenol            | 296                             | 70.1                       | 10                       | 1        |
| Triadimenol            | 296                             | 227                        | 10                       | 1        |
| Triallate              | 304                             | 86                         | 18                       | 1        |
| Triallate              | 304                             | 143                        | 25                       | 1        |
| Triasulfuron           | 402                             | 140.8                      | 15                       | 1        |
| Triasulfuron           | 402                             | 166.7                      | 15                       | 1        |
| Triazophos             | 314                             | 161.9                      | 15                       | 1        |
| Triazophos             | 314                             | 286                        | 15                       | 1        |
| Trifloxystrobin        | 409.05                          | 185.9                      | 10                       | 1        |
| Trifloxystrobin        | 409.05                          | 205.9                      | 10                       | 1        |
| Triflumizole           | 346                             | 73                         | 20                       | 1        |
| Triflumizole           | 346                             | 278                        | 10                       | 1        |
| Triticonazole          | 318.05                          | 70.08                      | 20                       | 1        |
| Triticonazole          | 318.05                          | 125                        | 25                       | 1        |

Table S1-6. The list of Precursor Ion, Product Ion, Collision Energy, and Polarity of pesticide active substances used in the GC/MSMS analysis.

| Compound          | Precursor Ion (m/z) | Product Ion (m/z) | Collision Energy (eV) | Polarity |
|-------------------|---------------------|-------------------|-----------------------|----------|
| 2-4 DDD (o-p DDD) | 235                 | 165.1             | 20                    | 1        |
| 2-4 DDD (o-p DDD) | 237                 | 165.1             | 20                    | 1        |
| 2-4 DDE (o-p DDE) | 246                 | 176               | 30                    | 1        |
| 2-4 DDE (o-p DDE) | 317.9               | 246               | 15                    | 1        |
| 2-4 DDT (o-p DDT) | 235                 | 165.1             | 20                    | 1        |
| 2-4 DDT (o-p DDT) | 237                 | 165.1             | 20                    | 1        |
| 4-4 DDD (p-p DDD) | 235                 | 165.1             | 20                    | 1        |
| 4-4 DDD (p-p DDD) | 237                 | 165.1             | 20                    | 1        |
| 4-4 DDE (p-p DDE) | 246                 | 176               | 30                    | 1        |
| 4-4 DDE (p-p DDE) | 317.9               | 246               | 15                    | 1        |
| 4-4 DDT (p-p DDT) | 235                 | 165.1             | 20                    | 1        |
| 4-4 DDT (p-p DDT) | 237                 | 165.1             | 20                    | 1        |
| Alachlor          | 161.1               | 146.1             | 5                     | 1        |
| Alachlor          | 188.1               | 160.1             | 10                    | 1        |
| Aldrin            | 66.1                | 65.1              | 10                    | 1        |
| Aldrin            | 292.9               | 185.93            | 30                    | 1        |
| Alpha BHC         | 180.9               | 145               | 15                    | 1        |
| Alpha BHC         | 218.9               | 182.9             | 5                     | 1        |
| Beta BHC          | 180.9               | 145               | 15                    | 1        |
| Beta BHC          | 180.9               | 146               | 15                    | 1        |
| beta-Cyfluthrin   | 163                 | 91.1              | 12                    | 1        |
| beta-Cyfluthrin   | 163                 | 127.1             | 6                     | 1        |
| Bromophos methyl  | 328.8               | 313.8             | 15                    | 1        |
| Bromophos methyl  | 330.8               | 315.8             | 15                    | 1        |
| Bromophos-ethyl   | 358.89              | 302.91            | 20                    | 1        |
| Bromophos-ethyl   | 358.89              | 330.9             | 10                    | 1        |
| Brompropylate     | 184.9               | 156.9             | 10                    | 1        |
| Brompropylate     | 342.8               | 184.9             | 15                    | 1        |
| Campechlor        | 315.1               | 195.2             | 28                    | 1        |
| Campechlor        | 377.1               | 255.1             | 34                    | 1        |
| Captan            | 149                 | 70                | 15                    | 1        |
| Captan            | 149                 | 105               | 5                     | 1        |
| Chinomethionate   | 206                 | 148               | 10                    | 1        |
| Chinomethionate   | 234                 | 206               | 10                    | 1        |
| Chlordan gamma    | 372.81              | 265.87            | 18                    | 1        |
| Chlordan gamma    | 374.81              | 267.87            | 15                    | 1        |
| Chlordan-alpha    | 372.81              | 265.87            | 18                    | 1        |

| Compound            | Precursor Ion<br>( <i>m/z</i> ) | Product Ion ( <i>m/z</i> ) | Collision<br>Energy (eV) | Polarity |
|---------------------|---------------------------------|----------------------------|--------------------------|----------|
| Chlordan-alpha      | 374.81                          | 267.87                     | 15                       | 1        |
| Chlorfenapyr        | 363.83                          | 247.21                     | 30                       | 1        |
| Chlorfenapyr        | 363.83                          | 282.12                     | 20                       | 1        |
| Chlorothal dimethyl | 300.8                           | 222.9                      | 25                       | 1        |
| Chlorothal dimethyl | 331.8                           | 300.8                      | 10                       | 1        |
| Chlorothlonil       | 263.9                           | 133                        | 36                       | 1        |
| Chlorothlonil       | 265.9                           | 133                        | 38                       | 1        |
| Chlorpyrifos-ethyl  | 314                             | 258                        | 13                       | 1        |
| Chlorpyrifos-ethyl  | 314                             | 286                        | 8                        | 1        |
| Dazomet             | 89                              | 44                         | 8                        | 1        |
| Dazomet             | 162                             | 89                         | 5                        | 1        |
| Delta BHC           | 180.9                           | 145                        | 15                       | 1        |
| Delta BHC           | 218.9                           | 183                        | 5                        | 1        |
| Demeton-S-methyl    | 109                             | 47                         | 12                       | 1        |
| Demeton-S-methyl    | 142                             | 79                         | 13                       | 1        |
| Diazinon            | 199.07                          | 93.03                      | 15                       | 1        |
| Diazinon            | 304.1                           | 179.06                     | 15                       | 1        |
| Dichlorvos          | 185                             | 93                         | 12                       | 1        |
| Dichlorvos          | 185                             | 109                        | 17                       | 1        |
| Dicofol             | 139                             | 75.1                       | 25                       | 1        |
| Dicofol             | 139                             | 111                        | 10                       | 1        |
| Dieldrin            | 276.91                          | 240.92                     | 12                       | 1        |
| Dieldrin            | 278.91                          | 242.92                     | 12                       | 1        |
| Dinobuton           | 163                             | 116                        | 15                       | 1        |
| Dinobuton           | 211                             | 117                        | 15                       | 1        |
| Diphenylamine       | 167.1                           | 139.1                      | 25                       | 1        |
| Diphenylamine       | 168.1                           | 139                        | 35                       | 1        |
| Endosulfan-alpha    | 240.89                          | 205.91                     | 10                       | 1        |
| Endosulfan-alpha    | 242.89                          | 207.91                     | 10                       | 1        |
| Endosulfan-beta     | 240.89                          | 205.91                     | 10                       | 1        |
| Endosulfan-beta     | 242.89                          | 207.91                     | 10                       | 1        |
| Endosulfan-sulfate  | 271.8                           | 236.9                      | 10                       | 1        |
| Endosulfan-sulfate  | 273.8                           | 238.9                      | 10                       | 1        |
| Endrin              | 81.1                            | 53.1                       | 10                       | 1        |
| Endrin              | 278.91                          | 242.92                     | 10                       | 1        |
| Esfenvalerate       | 125.05                          | 89                         | 15                       | 1        |
| Esfenvalerate       | 419.13                          | 225.07                     | 10                       | 1        |
| Ethalfuralin        | 276.1                           | 202.1                      | 15                       | 1        |

| Compound                | Precursor Ion<br>( <i>m/z</i> ) | Product Ion ( <i>m/z</i> ) | Collision<br>Energy (eV) | Polarity |
|-------------------------|---------------------------------|----------------------------|--------------------------|----------|
| Ethalfuralin            | 316.1                           | 276.1                      | 10                       | 1        |
| Ethofumesat             | 206.82                          | 160.86                     | 10                       | 1        |
| Ethofumesat             | 285.75                          | 206.82                     | 12                       | 1        |
| Ethoprophos             | 158.01                          | 97.01                      | 10                       | 1        |
| Ethoprophos             | 200.02                          | 158.01                     | 8                        | 1        |
| Fenitrothion            | 125                             | 79                         | 5                        | 1        |
| Fenitrothion            | 277                             | 260.1                      | 5                        | 1        |
| Fenthion                | 278                             | 109                        | 20                       | 1        |
| Fenthion                | 278                             | 245                        | 8                        | 1        |
| Fenvalerate             | 125.05                          | 89                         | 15                       | 1        |
| Fenvalerate             | 419.13                          | 225.07                     | 10                       | 1        |
| Fludioxonil             | 248.04                          | 154.02                     | 20                       | 1        |
| Fludioxonil             | 248.04                          | 182.03                     | 15                       | 1        |
| Folpet                  | 104.1                           | 50                         | 25                       | 1        |
| Folpet                  | 104.1                           | 76.1                       | 10                       | 1        |
| Fonofos                 | 109                             | 81                         | 5                        | 1        |
| Fonofos                 | 137                             | 109                        | 5                        | 1        |
| Formothion              | 87                              | 46                         | 20                       | 1        |
| Formothion              | 229                             | 87                         | 10                       | 1        |
| Gamma HCH (Lindane)     | 181                             | 145                        | 15                       | 1        |
| Gamma HCH (Lindane)     | 183                             | 147                        | 15                       | 1        |
| Heptachlor              | 100                             | 65.1                       | 10                       | 1        |
| Heptachlor              | 271.9                           | 236.9                      | 10                       | 1        |
| Heptachlor endo epoxide | 352.8                           | 262.9                      | 15                       | 1        |
| Heptachlor endo epoxide | 354.8                           | 265                        | 15                       | 1        |
| Heptachlor exo epoxide  | 183                             | 119                        | 20                       | 1        |
| Heptachlor exo epoxide  | 183                             | 155                        | 10                       | 1        |
| Hexachlorbenzene        | 283.8                           | 248.9                      | 15                       | 1        |
| Hexachlorbenzene        | 285.8                           | 250.9                      | 20                       | 1        |
| Imazalil                | 215.04                          | 145.02                     | 20                       | 1        |
| Imazalil                | 215.04                          | 173.03                     | 20                       | 1        |
| Iprodione               | 314                             | 245                        | 10                       | 1        |
| Iprodione               | 314                             | 271                        | 5                        | 1        |
| Lambda_Cyhalothrin      | 181.1                           | 152.1                      | 20                       | 1        |
| Lambda_Cyhalothrin      | 197.1                           | 141.1                      | 10                       | 1        |
| Methoxychlor            | 226.9                           | 199                        | 10                       | 1        |
| Methoxychlor            | 228.9                           | 201                        | 10                       | 1        |
| Metribuzin              | 198.08                          | 89.04                      | 16                       | 1        |

| Compound          | Precursor Ion<br>( <i>m/z</i> ) | Product Ion ( <i>m/z</i> ) | Collision<br>Energy (eV) | Polarity |
|-------------------|---------------------------------|----------------------------|--------------------------|----------|
| Metribuzin        | 198.08                          | 110.05                     | 20                       | 1        |
| Nuarimol          | 235.05                          | 139.03                     | 15                       | 1        |
| Nuarimol          | 314.06                          | 139.03                     | 15                       | 1        |
| Oxychlordane      | 386.79                          | 262.86                     | 15                       | 1        |
| Oxychlordane      | 386.79                          | 322.83                     | 15                       | 1        |
| Oxyflourfen       | 252.1                           | 146                        | 30                       | 1        |
| Oxyflourfen       | 252.1                           | 224.1                      | 10                       | 1        |
| Parathion ethyl   | 291.1                           | 81                         | 25                       | 1        |
| Parathion ethyl   | 291.1                           | 109                        | 10                       | 1        |
| Parathion methyl  | 109                             | 79                         | 5                        | 1        |
| Parathion methyl  | 124.1                           | 73                         | 15                       | 1        |
| Penconazole       | 248                             | 157                        | 25                       | 1        |
| Penconazole       | 248                             | 192                        | 13                       | 1        |
| Phorate           | 75.10                           | 47                         | 5                        | 1        |
| Phorate           | 121.1                           | 65                         | 10                       | 1        |
| Pirimiphos-methyl | 305                             | 180                        | 8                        | 1        |
| Pirimiphos-methyl | 305                             | 290                        | 10                       | 1        |
| Procymidone       | 283                             | 96.1                       | 10                       | 1        |
| Procymidone       | 285                             | 96.1                       | 10                       | 1        |
| Propyzamid        | 173.01                          | 109.01                     | 18                       | 1        |
| Propyzamid        | 175.02                          | 147.01                     | 15                       | 1        |
| Prothiofos        | 155                             | 127                        | 18                       | 1        |
| Prothiofos        | 155                             | 128                        | 14                       | 1        |
| Quinoxifen        | 237.1                           | 208.1                      | 25                       | 1        |
| Quinoxifen        | 272.1                           | 237.1                      | 10                       | 1        |
| Quintozene        | 236.9                           | 118.9                      | 20                       | 1        |
| Quintozene        | 236.9                           | 142.9                      | 20                       | 1        |
| Tecnazene         | 214.9                           | 179                        | 10                       | 1        |
| Tecnazene         | 260.9                           | 203                        | 10                       | 1        |
| Tetrachlorvinphos | 109                             | 79                         | 5                        | 1        |
| Tetrachlorvinphos | 331                             | 109.1                      | 15                       | 1        |
| Tetradifon        | 226.9                           | 199                        | 10                       | 1        |
| Tetradifon        | 355.9                           | 229                        | 10                       | 1        |
| Tetrasul          | 323.9                           | 252                        | 20                       | 1        |
| Tetrasul          | 323.9                           | 254                        | 20                       | 1        |
| Thiometon         | 93                              | 63                         | 8                        | 1        |
| Thiometon         | 246                             | 88                         | 8                        | 1        |
| Trichlorfon       | 79.1                            | 47                         | 8                        | 1        |



| Compound    | Precursor Ion<br>( <i>m/z</i> ) | Product Ion ( <i>m/z</i> ) | Collision<br>Energy (eV) | Polarity |
|-------------|---------------------------------|----------------------------|--------------------------|----------|
| Trichlorfon | 109.1                           | 79.1                       | 10                       | 1        |
| Trifluralin | 306.1                           | 160.1                      | 20                       | 1        |
| Trifluralin | 306.1                           | 264.1                      | 5                        | 1        |
| Vinclozolin | 212.1                           | 145                        | 20                       | 1        |
| Vinclozolin | 212.1                           | 172                        | 10                       | 1        |
